1 **Full Title:** Despite of DNA repair ability the Fanconi anemia mutant protein FANCGR22P  
2 destabilizes mitochondria and leads to genomic instability via FANCI helicase

3 **Authors** Jagadeesh Chandra Bose K<sup>1</sup>†, Bishwajit Singh Kapoor<sup>1</sup>†, Kamal Mondal<sup>1</sup>, Subhima  
4 Ghosh<sup>1</sup>, Raveendra B. Mokhamatam<sup>2</sup>, Sunil K. Manna<sup>2</sup>, and Sudit S. Mukhopadhyay<sup>1</sup>\*

5 **Affiliations**

6 1 Department of Biotechnology, National Institute of Technology Durgapur, Durgapur 713209,  
7 West Bengal, India.

8 † Equal contribution

9 2 Center for DNA Finger Printing and Diagnostics, Hyderabad

10 \*Corresponding author: [sudit.mukhopadhyay@bt.nitdgp.ac.in](mailto:sudit.mukhopadhyay@bt.nitdgp.ac.in)

11

12 **Summary**

13 Fanconi anemia (FA) is a unique DNA damage repair pathway. Almost twenty-two genes have  
14 been identified which are associated with the FA pathway. Defect in any of those genes causes  
15 genomic instability, and the patients bear the mutation become susceptible to cancer. In our  
16 earlier work, we have identified that Fanconi anemia protein G (FANCG) protects the  
17 mitochondria from oxidative stress. In this report, we have identified eight patients having  
18 mutation (C.65G>C; p.Arg22Pro) in the N-terminal of FANCG. The mutant protein  
19 hFANCGR22P is able to repair the DNA and able to retain the monoubiquitination of FANCD2  
20 in FANCGR22P/FGR22P cell. However, it lost mitochondrial localization and failed to protect  
21 mitochondria from oxidative stress. Mitochondrial instability in the FANCGR22P cell causes the  
22 transcriptional down-regulation of mitochondrial iron-sulphur cluster biogenesis protein Frataxin  
23 (FXN) and resulting iron deficiency of FA protein FANCI, an iron-sulphur containing helicase  
24 involved in DNA repair.

25

26

27

28

29

30

31

32

33

34

## 35 **Introduction**

36 Nuclear genomic instability is a common phenomenon and prerequisite for cancer. Genomic  
37 stability is maintained by the balance between the rate of DNA damage and rate of repair. Non  
38 repairable damage of the genome or genomic mutation may cause loss of heterozygosity (LOH),  
39 may activate proto-oncogenes, may inactivate tumor suppressor genes and/or can alter the  
40 regulation of genes associated with cell cycle and cellular signals(PC, 1976; Philpott et al., 1998;  
41 Veatch et al., 2009). These DNA damaging agents are either exogenous or endogenous. The most  
42 abundant endogenous DNA damaging agents are oxidative radicals which are produced primarily  
43 by mitochondria. Several studies suggest that one of the causes of genomic instability is the  
44 overproduction of reactive oxygen species (ROS) resulting from mitochondrial dysfunction  
45 (Vives-Bauza et al., 2006). When the extent of irreparable damage is extensive, then the cell  
46 undergoes apoptotic death, a normal phenomenon which is controlled by mitochondria (Kujoth et  
47 al., 2005). Therefore, the mitochondrion's role in malignancy is considerable because in addition  
48 to critical changes in metabolism mitochondria determine the balance between survival and death.  
49 However, the precise mechanism of how mitochondria maintain nuclear genomic stability is not  
50 clearly known. Alterations of both the mitochondrial and nuclear genomes have been observed in  
51 various types of cancers (Larman et al., 2012). In yeast, an association of mitochondrial function  
52 with genomic DNA integrity has been reported(Flury et al., 1976). Recently, it has been shown  
53 that under certain conditions, mitochondrial caspase may lead to nuclear DNA damage and  
54 genomic instability (Ichim et al., 2015). Daniel E. Gottschling's group created a specific mutant  
55 strain of *S cerevisiae* and showed that genomic stability is maintained by iron-sulphur cluster  
56 synthesis, an essential mitochondrial function (Veatch et al., 2009). Loss of mitochondrial  
57 membrane potential causes downregulation of iron-sulfur cluster (ISC) biogenesis, an essential  
58 mechanism for the Fe-S domain containing proteins involved in nuclear genomic stability(Kispal  
59 et al., 1999). However, this observation requires further studies to identify human pathogenic  
60 mutants that might be involved in the process.

61 In this report, we have explored this hypothesis by describing the mutation of a FA patient  
62 subtype G (FANCG). FA is a rare, hereditary, genomic instability and cancer susceptibility  
63 syndrome. Congenital disabilities and bone marrow failure are the most prominent features of FA  
64 patients. After consecutive bone marrow transplantation (BMT), patients suffer from BMT-  
65 associated problems and undergo increased cancer risk, including hematological malignancies and  
66 head and neck cancer (Rosenberg et al., 2005). To date, twenty two genes have been identified  
67 that associate with FA that are primarily involved in a specific type of DNA damage repair; inter-  
68 strand crosslink (ICL) repair. ICL is caused by the exogenous alkylating agents or endogenous

69 metabolites such as formaldehydes and acetaldehydes(Bluteau et al., 2016). Upon damage, out of  
70 twenty two, eight proteins (A, B, C, E, F, G, L & M) form a complex which is called the FA core  
71 complex(Walden and Deans, 2014). The FA core complex formation initiates the  
72 monoubiquitination of both FANCD2 and FANCI, which is called the ID2 complex. The ID2  
73 complex binds the damaged part of the chromatin and in association with other FA proteins and  
74 non-FA proteins repair the ICL damage. The repairing complex mostly consists of several  
75 exonucleases, endonucleases, helicases, and proteins involved in the DNA damage repair by  
76 homologous recombination pathway(Walden and Deans, 2014).

77 FANCI is a DEAH superfamily 2 helicase and part of the subfamily of Fe-S cluster-containing  
78 helicase-like proteins including XPD, RTEL1, and CHL1(Guo et al., 2016). FANCI cells are  
79 highly sensitive to ICL agents, and mutation studies suggest its association with cancer (Brosh  
80 and Cantor, 2014). Many genetic and biochemical studies suggest FANCI is an ATP dependent  
81 helicase which unwinds the duplex DNA or resolves G-quadruplex DNA structures (Guo et al.,  
82 2014). Thus, FANCI has an essential role in ICL damage repair and in maintaining genome  
83 stability. Recently, it has been shown that a pathogenic mutation in that iron-sulphur (Fe-S)  
84 cluster is essential for helicase activity and iron deficiency results in the loss of helicase activity  
85 of the FANCI but not the ATPase activity (Wu et al., 2010).

86 The sensitivity of the FA cell to the oxidative stress and several protein-protein interaction studies  
87 suggest that FA proteins are also involved in oxidative stress metabolism(Mukhopadhyay et al.,  
88 2006). In our earlier studies, we have shown that FA subtype G (FANCG) protein interacts with  
89 the mitochondrial protein peroxiredoxin 3 (PRDX3), a member of the peroxidase family and  
90 neutralizes the mitochondrial oxidative stress. In FANCG cells PRDX3 is cleaved by calpain  
91 protease and loses its peroxidase activity. Elevated oxidative stress alters the mitochondrial  
92 structure and loss of mitochondrial membrane potential was observed in the FANCG cells  
93 (Mukhopadhyay et al., 2006). These results suggest that FANCG protects the mitochondria from  
94 oxidative stress by preventing the PRDX3 from calpain-mediated degradation. Many groups  
95 including our own have debated the role of FA proteins in mitochondria (Pagano et al., 2014). In  
96 this report, we have identified the N-terminal thirty amino acids, which is unique to humans as the  
97 mitochondrial localization signal (MLS) of FANCG. Human mutation studies confirmed both the  
98 nuclear and mitochondrial roles of FANCG. The objective of the current study was to identify the  
99 defect of FANCI in mutant cells due to oxidative stress-mediated mitochondrial dysfunction. In  
100 conclusion, we showed that specific mutations in the mitochondrial localization signal in FANCG  
101 result in mitochondrial dysfunction result in genomic instability.

## 102 **Results**

### 103 **Identification of Mitochondrial Localization Signal (MLS) of human FANCG**

104 In our earlier studies, we have shown that human FANCG protein protects the mitochondrial  
105 peroxidase PRDX3 from calpain cleavage and subsequently mitochondria from oxidative  
106 stress(Mukhopadhyay et al., 2006). Since FA proteins are known to regulate nuclear DNA  
107 damage repair (DDR), this brings up the question of how the FANCG protein migrates to  
108 mitochondria. Of the thousands of nuclear proteins that migrate to mitochondria (Backes et al.,  
109 2018) some have been shown to have mitochondrial localization signals. However, many of them  
110 do not have an identifiable signal peptide. Generally proteins migrate to mitochondria through the  
111 interaction of TOM (mitochondrial outer membrane protein) and TIM (mitochondrial inner  
112 membrane protein) and some proteins enter with the help of carrier proteins(Nickel et al., 2018).  
113 Human FANCG contains a TPR motif (tetratricopeptide repeat) which is known to facilitate  
114 protein-protein interaction(Wilson et al., 2010). Initially, we thought that FANCG might interact  
115 with some TPR-containing TOM proteins. However, immuno-precipitation (IP) studies did not  
116 support this idea (data not shown).

117 There are several online tools available, which can be used for identification of the signal peptide  
118 sequence for protein cellular localization. Similarly, some specific tools are also available for  
119 identification of mitochondrial localization signals (MLS) (Bannai et al., 2002). We have utilized  
120 all the available tools for identification of the MLS of the FA proteins (Table S1A & B;  
121 SuppleFig.S1.A, B and C). The iPSORT analysis predicted thirty amino acids at the N-terminal of  
122 human FANCG protein as a mitochondrial localization signal (MLS) or Mitochondrial Targeting  
123 Peptide (mTP) (Fig.1A). However, when we analyzed the N-terminal of FANCG of other species,  
124 mTP was identified only in human FANCG (Fig.1B & C). For confirmation of this result, the  
125 expression of the protein in a mammalian cell line is required. As the N-terminal thirty amino  
126 acids were predicted as an MLS, we made several N-terminal deletion FANCG constructs  
127 (05DEL, 09DEL, 18DEL, 24DEL, and MLSDEL {30 amino acids}) containing ATG sequences  
128 as a start codon (Fig. 1D). All the deletion constructs were sequenced and confirmed to retain an  
129 open reading frame. To visualize the FANCG expression in the cell line, the wild-type and the  
130 deleted constructs were tagged with GFP at the C-terminal end. The mitochondrial marker Mito-  
131 tracker (pDsmi-to-Red) was used in these co-localization studies. Each deletion construct  
132 including a wild type control was transiently expressed along with mito-tracker in HeLa cells. The  
133 expression of both the constructs was analyzed by deconvolution microscope (Axio Observer.Z1,

134 Carl Zeiss; Axiovision software). The wild-type FANCG fused with GFP showed perfect co-  
135 localization with Mito-tracker in mitochondria of HeLa cells (Fig.1D). However, the deleted  
136 constructs showed loss of co-localization with Mito-tracker (Fig.1D). The complete loss of co-  
137 localization was observed following deletion of 18, 24 and 30 amino acids (MLSDEL) (Fig.1D).  
138 These co-localization studies suggest that the in silico predicted N-terminal thirty amino acids are  
139 the mitochondrial targeting Peptide (mTP) which actually determines the mitochondrial  
140 localization of human FANCG.

#### 141 **Human mutant FANCGR22P lost mitochondrial localization, but not nuclear localization.**

142 We further looked for pathogenic mutations in the MLS of FANCG. We identified eight FA  
143 patients from the Fanconi Anemia database of Rockefeller  
144 University{<http://www.rockefeller.edu/fanconi/>; Leiden Open Source Variation Database  
145 (LOVD v.3.0)}. In these eight FA patients due to a single nucleotide change (C.65G>C), the  
146 amino acid arginine at the twenty-two position of the MLS was converted into proline (p.  
147 (Arg22Pro). The iPSORT analysis predicted the loss of mitochondrial migration of this mutant  
148 protein (R22P) (Supple Fig.S2 A & B). We wanted to understand how the single nucleotide  
149 change affects the structure of the protein. The crystal structure of human FANCG is not known.  
150 In the secondary structure, the MLS of FANCG is made with an alternate stretch of coil and helix.  
151 The helix is interrupted by a coil in R22P due to replacement of arginine by proline (Fig.2A). In  
152 our modeled structure, similarly, the MLS region of R22P is disrupted due to the replacement of  
153 arginine by proline (Fig.2B). How the altered structure affects the mitochondrial migration is not  
154 clear. Thus, R22P mutant construct was made and transiently transfected into the HeLa cells  
155 along with Mito-tracker. The co-localization study suggested the complete loss of migration of  
156 R22P into mitochondria (Fig.2C). Co-localization studies of R22P in different passages of HeLa  
157 cells as well as in FANCG parental cells further confirmed its inability of mitochondrial  
158 localization (Supple Fig.S2 C & D). We have identified another FANCG patient (S07F) with a  
159 mutation in MLS sequence (serine at the seventh position is converted into phenylalanine).  
160 However, S07F protein can localize to mitochondria (Fig.2C). FANCG as a member of the FA  
161 core complex remains associated with chromatin, and we searched whether the mutant protein  
162 R22P can migrate to the nucleus. The cell biology studies in HeLa cells suggest that the mutant  
163 protein R22P can migrate to the nucleus upon MMC treatment like the wild-type FANCG  
164 (Fig.2D). All these results suggest that FANCG human mutant R22P cannot migrate to  
165 mitochondria but can migrate to the nucleus upon MMC treatment.

166

#### 167 **FANCGR22P cells are sensitive to oxidative stress but resistant to ICL agents**

168 In order to elucidate whether the FANCG human mutant R22P is functional in the nucleus or not,  
169 the R22P stable cell line (Fig.3A & 3B) was developed in the background of FANCG parental  
170 cells (lacking FANCG; obtained from Dr. Agata Smogorzewska's lab, The Rockefeller  
171 University, NY) (Fig.3A & 3B). The MMC-mediated FANCD2 monoubiquitination was analyzed  
172 in the R22P stable cells, FANCG corrected cells and in FANCG parental cells (Fig.3C).  
173 Surprisingly, like FANCG-corrected cells FANCD2 monoubiquitination was observed in the  
174 R22P stable cell upon MMC treatment (Fig.3C, lane 1 and 2). Monoubiquitination of FANCD2 is  
175 absent in FANCG parental cells treated with MMC (Fig.3C lane 3) and also in the cells not  
176 treated with MMC (Fig.3C, lane 4, 5 and 6). This experiment confirmed that FANCG human  
177 mutant protein R22P is able to participate in the formation of FA core complex in the nucleus. In  
178 order to understand the DNA repair ability of the R22P stable cells, drug sensitivity tests were  
179 performed. FANCG corrected, parental and R22P cells were treated with increasing concentration  
180 of MMC and cisplatin separately for two and five days. Cell survival was determined both by  
181 MTT and Trypan blue assay (Fig 4 & Supple Fig S3). To our surprise, even with five days of  
182 treatment with drugs in increasing concentration, the R22P stable cells showed resistance to both  
183 MMC and cisplatin like the FANCG corrected cells (Fig.4A, B, C & D). Even with formaldehyde  
184 treatment for two hrs, the R22P stable cells showed resistance compared to FANCG parental cells  
185 (Fig.4G & Supple Fig.S3G). These drug sensitivity results all suggested that FANCG human  
186 mutant protein R22P can form FA core complex and can repair the ICL damage.

187 In contrast, when the cells were treated with hydrogen peroxide for two hours and twenty-four  
188 hrs, like FANCG parental cells R22P cells showed sensitivity to oxidative stress (Fig.4E & F;  
189 supple Fig.S3 E & F). This result confirms our previous observation (Mukhopadhyay et al., 2006)  
190 that the role for the FANCG protein in mitochondria with respect to sensitivity to oxidative stress  
191 results from diminished peroxidase activity. In summary, it can be concluded that FANCG has  
192 dual roles: DNA damage repair in the nucleus and oxidative stress metabolism in mitochondria.

### 193 **Correlation between mitochondrial instability and genomic instability**

194 The R22P mutant can repair the genomic DNA but fails to protect the mitochondria from  
195 oxidative stress. In spite of the nuclear DNA damage repair ability, the R22P patients are  
196 susceptible to getting cancer (D. et al., 2003). However, the question remains whether oxidative  
197 stress-mediated mitochondrial dysfunction influences the genomic DNA damage or not.  
198 Mitochondria of the R22P patients are under constant (endogenous) oxidative stress since birth  
199 and oxidative stress increases with age. Their genomic DNA is also attacked by several  
200 exogenous and endogenous ICL agents. Thus, an experiment on cell lines was set up to determine  
201 the extent of DDR in cells expressing the R22P mutant protein. The R22P cells, FANCG



202 corrected cells, and FANCG parental cells were treated with mild oxidative stress (10 $\mu$ M of  
203 H<sub>2</sub>O<sub>2</sub>) for fourteen (14) hrs continuously, and at an interval of every two hrs, the cells were  
204 treated with a low dose of MMC (100nM) for thirty min. Then the cells were stained with JC-1  
205 dye to determine the loss of mitochondrial membrane potential ( $\Delta\Psi$ ), and  $\gamma$ -H2AX foci formation  
206 was determined in order to analyze the nuclear DNA damage (Fig. 5A). The percentage of  
207 depolarized (green and yellow) mitochondria and the number of nuclear foci at each time point  
208 were calculated in all three types of cells. From these results, we determined the percentage of  
209 functional mitochondria and the number of nuclear foci of the cells (8-10 fields and each field  
210 contains 10-12 cells) as represented in graphical form (Fig. 5B). In FANCG corrected cells, the  
211 percentage of depolarized mitochondria is very low at initial time points (up to six hrs). Eight hrs  
212 onwards the percentage of depolarization started to increase, and by fourteen hrs approximately  
213 twenty percent of depolarized mitochondria are observed (Fig. 5B). However, in both FANCG  
214 parental and R22P stable cells the percentage of depolarized mitochondria is very high at early  
215 time points (up to six hrs) compared to corrected cells. The percentage of depolarization is also  
216 increased with time in both cells. At fourteen hrs approximately 35 and 40 percent of  
217 depolarization mitochondria are observed in R22P and FANCG parental cells respectively (Fig.  
218 5A&B). So, these experiments suggest that oxidative stress-mediated mitochondrial dysfunction  
219 is very high in FANCG parental and R22P cells compared to FANCG corrected cells.

220 Similarly in FANCG corrected cells, the number of  $\gamma$ -H2AX foci is very low at early time points,  
221 and then the foci number increased with time. However, compared to the other two cells, the  
222 number of foci is low in FANCG corrected cells. At fourteen hrs the intensities of the foci are  
223 diminished, which suggests improved repair in the cells at that time point which was not observed  
224 either in FANCG parental or R22P cells (Fig. 5A). In FANCG parental cells, the foci number is  
225 very high at the initial time point of two hrs, and it continued to be high as compared to both  
226 FANCG corrected and R22P cells (Fig. 5A & 5B). The FANCG protein is absent in parental cells  
227 and is unable to protect either the nuclear DNA or the mitochondria. Whereas, in R22P cells, the  
228 number of foci is less at the initial time points of two to twelve hrs as compared to parental cells.  
229 After that, the number of foci is almost equal in both cell lines at a later stage (fourteen hrs; Fig  
230 5B). As the foci number in the nucleus of R22P cell is lower than the parental cell at early times  
231 of treatment (2-12 hrs), this suggests that R22P cells can repair the DNA at early stages. After that  
232 percentage of depolarized mitochondria increased, crosses an apparent threshold, the R22P cells  
233 failed to repair DNA. Thus, at later times after exposure (14hrs) the number of foci is almost

234 equal in both FANCG parental and R22P cells. All these observations clearly suggest that  
235 mitochondrial dysfunction influences the nuclear DDR.

### 236 **Mitochondrial instability causes defective FANCI in R22P cells**

237 Nuclear genomic instability can be the result of various types of mitochondrial  
238 dysfunction (Tokarz and Blasiak, 2014). One of the most important is the loss of mitochondrial  
239 membrane potential ( $\Delta\Psi$ ) which inhibits the production of iron-sulfur prosthetic groups and  
240 impairs the assembly of Fe-S proteins (Kaniak-Golik and Skoneczna, 2015). Mitochondrial  
241 dysfunction inhibits the production of the iron-sulfur cluster (ISC) containing proteins, which are  
242 essential for maintaining the nuclear genome stability (Kaniak-Golik and Skoneczna, 2015; Lill et  
243 al., 2012; Richardson et al., 2010). To our surprise, we found that FA subtype J (FANCI), an ISC  
244 containing helicase is essential for ICL repair. An attempt was made to see the transcriptional  
245 down-regulation of several of ISC-containing proteins involved in DNA damage repair along with  
246 FANCI by real-time PCR. In our initial experiment the transcriptional down regulation was not  
247 observed in the cells (FANCG corrected, FANCG R22P and FANCG parental) treated with  $H_2O_2$   
248 ( $10\mu M$ ) for fourteen hrs and followed by thirty min of MMC treatment for every two hrs (data not  
249 shown). Several human pathological mutants are identified in the Fe-S domain of FANCI. The  
250 loss of iron-binding in the mutant protein resulted in the loss of helicase activity, suggesting the  
251 importance of iron in maintaining the structure and function of FANCI (Wu et al., 2010). We  
252 wanted to compare the status of the FANCI protein in terms of iron-binding and helicase activity  
253 in all three sets of cells at each time point of the experiment ( $10\mu M$  of  $H_2O_2$  for fourteen hrs and  
254 followed by thirty min treatment with  $100\text{ nM}$  of MMC after every two hrs). Cells were treated  
255 with medium containing labeled iron ( $^{55}Fe$ ). After MMC treatment cells were lysed at every time  
256 point. An equal amount of protein was used for IP with FANCI antibody and protein A/G agarose  
257 beads. The quantitation of  $^{55}Fe$  was used to estimate the amount of iron in FANCI (Pierik et al.,  
258 2009). The amount of iron present in FANCI of each cell type at zero time was considered as  
259 hundred and was compared with the amount of iron present in the same cells at other time points  
260 (relative percentage). The continuous reduction of iron of FANCI with time was observed only in  
261 both the R22P and FANCG parental cells (Fig.6A). Almost a fifty percent loss of iron of the  
262 FANCI protein was observed in these two cells at later stages (8,10,12 and 14hrs) (Fig.6A)  
263 compared to FANCG corrected cells. Whereas, the percentage of iron of FANCI was unaltered or  
264 was increased in FANCG corrected cells. Western blot analysis confirmed the amount of FANCI  
265 protein present in each IP (Fig.6B). From these observations, it can be concluded that loss of  
266 mitochondrial membrane potential ( $\Delta\Psi$ ) causes iron depression of the FANCI protein only in  
267 R22P stable and FANCG parental cells. FANCI is dependent on mitochondria for Fe-S cluster



268 domain (Rudolf et al., 2006). As a control iron binding of ferritin is not reduced in these  
269 experiments (Fig. S4). Ferritin is independent of mitochondria for the iron source (Mackenzie et  
270 al., 2008). Thus, the *in vivo* iron uptake experiment suggests that the high percentage of  
271 depolarized mitochondria causes the iron deficiency of FANCI in both R22P and FANCG  
272 parental cells which potentially may affect the helicase activity.

273 Fe-S cluster metabolism occurs in mitochondria in two major steps: (i) Fe-S cluster synthesis and  
274 (ii) transfer of Fe-S cluster to recipient protein (Fig6D). A complex of proteins is involved in each  
275 step (Lill and Mühlenhoff, 2008). The Fe-S cluster biogenesis proteins are mainly nuclear protein,  
276 and they migrate to mitochondria. The cause of iron deficiency of FANCI protein in R22P and  
277 FANCG parental cells is either the difficulty of migration of the nuclear protein into mitochondria  
278 due to alteration of mitochondrial membrane potential or the downregulation of Fe-S cluster  
279 proteins due to mitochondrial stress. Cytochrome C is nuclear gene but present in the  
280 mitochondrial matrix. Tom70 is nuclear gene but present in the mitochondrial outer membrane.  
281 The localization of Cytochrome C may alter due to loss of mitochondrial membrane potential.  
282 But, the localization of Tom70 should not be hampered in spite of mitochondrial membrane  
283 potential loss (Veatch et al., 2009). To help elucidate this mechanism we have transiently  
284 expressed human Tom70- tagged with GFP and human Cytochrome C-tagged with RFP into the  
285 R22P cells. Cells without treatment showed complete co-localization of both Tom70 and  
286 Cytochrome C. But the cells treated with H<sub>2</sub>O<sub>2</sub> did not show complete co-localization of Tom70  
287 with Cytochrome C (Fig.6E). Thus, these results suggest that Cytochrome C did not migrate into  
288 the matrix due to the loss of mitochondrial membrane potential. We have also studied the  
289 transcriptional expression of the Fe-S cluster genes in the FANCG corrected and R22P cells. The  
290 cells were treated with 10 $\mu$ M of H<sub>2</sub>O<sub>2</sub> for twelve hrs and followed by thirty min treatment  
291 with 100nM of MMC after every two hrs. The expression of the genes was compared between  
292 these two cells by Real Time PCR (Fig.6C). The expression of Frataxin (Fxn) was significantly  
293 decreased in R22P cells as compared to FANCG corrected cells. The lower expression of FXN  
294 was observed from 8hrs of treatment, consistent with the result shown in Fig.6A. FXN is essential  
295 for Fe-S cluster biogenesis. However, the expression of NFU1 is not altered (Fig6C). Nfu1 is  
296 responsible for transportation of the Fe-S cluster to recipient proteins. Thus these results suggest  
297 that the transcription of the FXN is significantly reduced in R22P cells as compared to FANCG  
298 corrected cells, because of the greater number of dysfunction mitochondria in R22P cells.  
299 However, decreased mitochondrial migration of the ISC proteins due to loss of mitochondrial  
300 membrane potential also cannot be ruled out.

## 301 **Discussion**

## 302 **Unique Mitochondrial Localization Signal of human FANCG**

303 We have used different in silico tools to identify the mitochondrial localization signal of human  
304 FANCG. These tools predict two things; (i) whether the protein contains any mitochondrial  
305 localization signal or (ii) mitochondrial localization of the protein. These analyses strongly  
306 predicted the N-terminal thirty amino acids of human FANCG as a mitochondrial localization  
307 signal (MLS) and correlated with the mitochondrial existence of the human FANCG. FANCG  
308 sequences from other species have been analyzed, and none of them are found to carry the  
309 MLS/mTP either at N-terminal or C-terminal except human. Thus, one hypothesis to explain this  
310 discrepancy is that the MLS region has evolved later in humans and as a result, human FANCG  
311 has acquired the ability of regulates mitochondria function in addition to the nuclear DNA  
312 damage repair.

313 Interestingly, the FANCG knockout(KO) mice do not exhibit any severe phenotype. FANCG  
314 cells derived from KO mice are only mildly sensitive to ICL agents, but not sensitive to oxidative  
315 stress (Parmar et al., 2009; Pulliam-Leath et al., 2010; Yang et al., 2001). However, expression  
316 studies of FANCG in other species will be required to help explain this result.

317 We have identified several mutations in the MLS region of human FANCG from the LOVD, and  
318 COSMIC (catalogue of somatic mutation in cancer) database and their mitochondrial localization  
319 has been studied (unpublished results). In this report, we are describing one pathogenic mutation  
320 where the 22<sup>nd</sup> Arginine has been replaced by Proline (FANCGR22P). GFP expression of this  
321 fusion construct suggests its inability to migrate into mitochondria. The predicted structure  
322 suggests as expected by many studies of the effects of proline insertions on alpha-helical  
323 structures that the helix is broken due to replacement of arginine by proline at the N-terminal of  
324 FANCG. Several studies suggested the importance of arginine for mitochondrial localization of  
325 proteins (Neve and Ingelman-Sundberg, 2001). A most interesting feature of this mutant protein  
326 combines its inability to migrate to mitochondria with its ability to translocate to the nucleus.  
327 These phenotypes were confirmed by drug sensitivity experiments. R22P stable cells are  
328 resistance to ICL drugs like FANCG-corrected cells and sensitive to oxidative stress like FANCG  
329 parental cells. FANCD2 monoubiquitination in R22P cells also suggests the ability of the mutant  
330 protein to form the FA complex. Thus, the phenotype of the R22P pathogenic mutation resolves  
331 the long-lasting debate of FA protein's role in mitochondria. An open question can be raised  
332 about the implication(s) of these results in the clinical diagnosis of FA patients. Some patients are  
333 diagnosed as FA by phenotypic features, though the drug sensitivity test of their cells suggests  
334 negative (chromosome breakage test). In that case, drug sensitivity tests should be performed in  
335 the presence of mild oxidative stress (Suppl Fig.5A, 5B)

## **Mitochondrial dysfunction causes defective FANCI: Mitochondrial instability leads to genomic instability**

The inability of the cell to repair DNA damage may result in cancer. In this study, we have found that despite the genomic DNA repair ability, the R22P patients are also affected by cancer (LOVD database). R22P cells are highly sensitive to oxidative stress, and loss of mitochondrial membrane potential is observed due to oxidative stress (Mukhopadhyay et al., 2006). From these two observations, we suggest that there is a correlation of the mitochondrial instability with genomic instability. Many studies suggest that mitochondrial DNA mutation and loss of mitochondrial membrane potential may cause cancer (Tokarz and Blasiak, 2014). One proposed mechanism is that the reactive oxygen species (ROS) produced due to mitochondrial dysfunction may destabilize the cellular macromolecules, including the damage of genomic DNA (Nunnari and Suomalainen, 2012). So far, an association of oxidative stress with inter-strand cross-linking (ICL) damage is not known. In order to elucidate this association, we performed an experiment with R22P cells (Fig.5). The results suggest that R22P cells can repair the ICL damage as long as there is a certain level of functional mitochondria in the cell. When this percentage is reduced, R22P cells fail to protect their genomic DNA from ICL damage. Fe-S containing proteins are essential for their role in various cellular functions such as catalysis, DNA synthesis, and DNA repair (Netz et al., 2014). Fe-S proteins depend on mitochondria for their Fe-S domain because the iron-sulfur cluster (ISC) synthesis is one of the major functions of mitochondria (Lill and Mühlenhoff, 2008). Several reports suggested that assembly of all ISC-containing proteins requires intact mitochondria (Biederbick et al., 2006). Even the loss of mitochondrial DNA or loss of mitochondrial membrane potential impairs the ISC biogenesis (Kispal et al., 1999). Recently, Daniel Gottschling's group has shown in a yeast system that loss of mitochondrial DNA causes a defect in mitochondrial iron metabolism (Veatch et al., 2009). But this study is the first report of defective Fe-S containing protein FANCI due to oxidative stress-mediated mitochondrial dysfunction. In vivo studies in R22P cells suggest that significant deficiency of iron in FANCI helicase occurs due to loss of mitochondrial membrane potential (Fig.6A). Several studies suggest that deficiency of iron of the Fe-S containing protein may result in the loss of helicase activity (Wu et al., 2010), but we were unable to test this directly. Moreover, in our studies, we only have studied FANCI, but other Fe-S containing cellular proteins involved in DNA damage repair also might have been affected (Netz et al., 2014). Altogether, our results strongly suggest that in normal cells FANCG protects the mitochondria from oxidative stress. As a result, mitochondria maintain the ISC biosynthesis and provide Fe-S cluster for maintaining the Fe-S domain of active FANCI helicase, which is required for nuclear DNA damage repair (Fig7). In

R22P cells, ISC biosynthesis is either low or impaired due to mitochondrial dysfunction. We have identified the down regulation of FXN in R22P cells as compared to FANCG corrected cells under stress condition. FXN is an important protein involved in ISC biogenesis, and the defect in ISC biosynthesis leads to various human diseases. However, how the mitochondrial stress regulates the transcription of Fxn is not known. One possibility is that via SP1, a ubiquitous transcription factor present in the promoter region of the human Fxn gene(Li et al., 2010). The sumoylation of SP1 under oxidative stress and the subsequent lack of DNA binding has been reported(Wang et al., 2008).

The difficulty in mitochondrial import of nuclear proteins involved in ISC biosynthesis provides another possibility. As a result, FANCI will be depleted in iron required for Fe-S domain. So, the defective FANCI is unable to repair the nuclear DNA (Fig.7). We found that there is certain percentage of defective mitochondria in the cells which do not affect the overall ISC biosynthesis in the cell. However, when this number decreases to a critical threshold, then the ISC containing proteins will undergo an iron crisis. Further studies with R22P cells are required to identify the threshold percentage of dysfunctional mitochondria. Our studies with certain FA mutations help confirm the relevance of non-respiratory function of mitochondria in disease progression. This is not unique, but a common phenomenon, the known consequence of cellular oxidative stress.

## Experimental Design

### In-silico tools used:

1. TargetP1.1(<http://www.cbs.dtu.dk/services/TargetP/>)
2. iPSORT server (<http://ipsort.hgc.jp/>)
3. MitoProt(<https://ihg.gsf.de/ihg/mitoprot.html>)
4. PredotarMito(<https://urgi.versailles.inra.fr/predotar/predotar.html>)
5. TPpred2.0(<http://tppred2.biocomp.unibo.it/tppred2/default/help>)
6. RSLpred(<http://www.imtech.res.in/raghava/rsllpred/>)
7. iLocAnimal(<http://www.jci-bioinfo.cn/iLoc-Animal>)
8. MultiLoc/TargetLoc(<https://abi.inf.uni-tuebingen.de/Services/MultiLoc>)

### Database used:

1. LOVD database(<http://databases.lovd.nl/shared/variants/FANCG/unique>)
2. COSMIC database (<http://cancer.sanger.ac.uk/cosmic/gene/analysis>)

### Protein structure prediction:

1. Secondary structure: An advanced version of PSSP server is used for prediction of protein secondary structure by using nearest neighbor and neural network approach.

2. Tertiary structure: the Tertiary structure is predicted by I-TASSER(<http://zhanglab.ccmb.med.umich.edu/I-TASSER/>). Structural templates of the proteins are first identified from the PDB by multiple threading approach LOMETS. Full-length atomic models were constructed by iterative template fragment assembly simulations. The function insights of the target proteins were finally derived by threading the 3D models through protein function database BioLiP.

**Cell lines:** The cell lines HeLa and HEK293 were obtained from ATCC and maintained in Dulbecco's modified Eagle medium (DMEM) supplemented with 10%(v/v) fetal bovine serum(FBS) and 1x penicillin/streptomycin (Himedia). FANCG corrected (FG<sup>+/+</sup>) and FANCG parental (FG<sup>-/-</sup>) fibroblast cells were generous gift from Dr.AgataSmogorzewska (The Rockefeller University, New York, USA) while FANCG mutant(R22P) fibroblast cells were prepared in our laboratory and are maintained in Dulbecco's Modified Eagle medium (DMEM) supplemented with 15% (v/v) fetal bovine serum (FBS) and 1x penicillin/streptomycin (Himedia).

#### Antibodies:

| NAME OF THE ANTIBODY                     | CODE    | TYPE              |
|------------------------------------------|---------|-------------------|
| Anti-gamma H2A.X (phospho S139) antibody | ab2893  | Rabbit polyclonal |
| Anti-FANCD2 antibody                     | ab2187  | Rabbit polyclonal |
| Anti-DDDDK tag antibody                  | ab1162  | Rabbit polyclonal |
| Anti-FANCG antibody                      | ab54645 | Mouse monoclonal  |
| Anti-GAPDH antibody                      | ab9484  | Mouse monoclonal  |
| Anti-BACH1/BRIP1 antibody                | ab49657 | Rabbit polyclonal |
| Anti-Ferritin antibody (Sigma)           | F5012   | Rabbit polyclonal |

**Constructs:** pcDNA3-EGFP (#13031), pLJM1-EGFP (#19319), pCMV-VSV-G (#8454) and pSPAX2 (#12260) was obtained from Addgene. The construct pDsRed2-Mito encoding a fusion of *Discosomasp* red fluorescent protein (DsRed2) and a mitochondrial targeting sequence of human cytochrome c oxidase subunit VIII (Mito) was purchased from Clontech Laboratories. Full-length FANCG-wt cDNA was initially cloned into TA vector pTZ57R/T (Thermo-scientific) that was further utilized as a template for the full length and N-terminal deletion constructs of FANCG. Full length and N terminal deletion (up to 30 amino acid) constructs of FANCG were subcloned into the KpnI and EcoRI site of pCDNA3-EGFP to encode C-terminal EGFP tagged FANCG proteins. FANCG mutants were constructed by conventional PCR method, using full-length FANCG-wt-pcDNA3-EGFP as a template followed by DpnI treatment. FANCG mutant

435 R22P (Arginine to proline at the 22<sup>nd</sup> position from N-Terminal) was further sub cloned into the  
436 EcoRI and SpeI site of lentiviral vector pLJM1-EGFP. Full length TOM70-wt was cloned into  
437 KpnI and EcoRI site of pcDNA3-EGFP to encode C-terminal EGFP tagged TOM70 proteins. All  
438 the primers utilized are given below.

439 **Primers:**

| Primers used for the PCR amplification of FANCG truncated deletions |                                                           |
|---------------------------------------------------------------------|-----------------------------------------------------------|
| Name                                                                | PRIMER SEQUENCE                                           |
| 05-DEL                                                              | For: 5'- CGGGATTCATGAGCTGCCTGGACCTGTGGAGGG -3'            |
| 09-DEL                                                              | For: 5'- CGGGATTCATGAATGACCGGCTCGTTCGACAGGC -3'           |
| 18-DEL                                                              | For: 5'- CGGGATTCATGCAGGCCAAGGTGGCTCAGAACTCC -3'          |
| 24-DEL                                                              | For: 5'- CGGGATTCATGGCTCAGAACTCCGGTCTGACTCTGAGG -3'       |
| MLS-DEL                                                             | For: 5'- CGGGATTCATGCAGAACTCCGGTCTGACTCTGAGGC-3'          |
| For All                                                             | Rev :5'-GCAGAATTCCTACAGGTCACAAGACTTTGGCAGAGATGTCCG -3'    |
| R22P                                                                | Forward: 5'- GGAAAAGAATGACCCGCTCGTTCGACAGG -3'            |
| R22P                                                                | Reverse: 5'- CCTGTGCAACGAGCGGGTCATTCTTTTCC -3'            |
| TOM70                                                               | Forward: 5'- CGGGGTACCATGGCCGCCTCTAAACCTG-3'              |
| TOM70                                                               | Reverse:5'- CCGGAATTCTAATGTTGGTGGTTTTAATCCGTATTTCTTTGC-3' |

440

441 **Immunofluorescent Microscopy**

442 Cells were grown onto Poly-L-Lysine coated coverslips in 60mm dishes and were transfected  
443 with the indicated constructs using Lipofectamine(Fermentus) for 48hrs. Cells were incubated in  
444 blocking buffer (5% nonfat milk in 1XPBS/ 5% FBS in 1XPBS) for one hr followed by one hr  
445 incubation with primary antibody at room temperature. After that cell was washed with 1X PBS  
446 followed by one hr incubation with respective secondary antibody tagged with either FITC or  
447 Texas Red. The cells were fixed with either with 4% paraformaldehyde (Himedia) for 10 minutes  
448 or in ice-cold methanol solution for 5 minutes. 0.2% TritonX-100 can be treated for two minutes  
449 for permeabilization of the antibody into cells. Then the coverslips were air dried and mounted  
450 with mounting medium with DAPI (Vectashield) on a glass slide by inverting the coverslips  
451 upside down. The mounted cells kept in dark for 15 minutes and fixed the coverslip with  
452 transparent nail polish. Imaging was performed on a fluorescence microscope (Axio observer.Z1,  
453 Carl Zeiss Micro-Imaging, Germany) attached with Axiocam HRM CCD camera and Apotome.2.  
454 Axiovision software (Zenpro2012) and Adobe photoshop7.0 software were used for  
455 deconvolution imaging and image analysis.

456 **FANCG R22P Mutant Stable Cell Line development:**

457 **Development of Virus Particle in HEK293 Cells**

458 FANCG R22P initially was cloned into pCDNA3-EGFP. It was PCR cloned into the TA vector  
459 pTZ57R/T (Thermo Scientific) for creating compatible enzyme site for Lenti vector. Now the  
460 R22P construct was digested with EcoR1 and BamH1and cloned into the viral packing vector



461 pLJM1-EGFP (Addgene). The viral particle protein containing vectors pCMV-VSV-G, psPAX2,  
462 and FG R22P-pLJM1-EGFP constructs were transfected (1:1:3) into HEK293 cells by Turbofect  
463 (Fermentas). The cells were grown for forty-eight (48) hrs for development of the virus particle.

#### 464 **Integration of R22P into the genome of FANCG (-/-) parental cells**

465 The cell culture medium containing virus particles were collected into a 15 ml sterile centrifuge  
466 tube and centrifuged 14,000rpm for 30 minutes at 4°C to remove the cellular debris and stored at  
467 4°C. Fresh media was added to each HEK293 cell monolayer and incubated for another 12 hrs.  
468 This media was collected and centrifuged 14,000 rpm for 30 minutes at 4°C and mixed with the  
469 earlier supernatant. Total media was filtered by 0.22- $\mu$ m syringe filter unit (Millipore) and was  
470 centrifuged again for 60 min at 14,000 rpm, at 4°C. Gently the supernatant was removed by  
471 pipette and fresh media was added to the tube containing precipitate at the bottom and again the  
472 same step was repeated to concentrate the lentiviral particles. Ultimately the supernatant  
473 containing virus was added to the flask of sixty (60) percent confluent FANCG parental cells and  
474 incubated the cells for forty-eight hrs. Two days after infection, the cells were checked for GFP  
475 fluorescence and puromycin resistance cells were developed by adding increasing concentrations  
476 of puromycin (2-5 $\mu$ g/ml) in the media. The puromycin resistant cells were subcultured several  
477 times and preserved in freezing media at -80°C for further usage. The stable cells were confirmed  
478 by Western blot with FANCG specific antibody.

#### 479 **Cell Survival Assay:**

##### 480 **Cell Viability Test by Trypan blue dye exclusion:**

481 An equal number of each cell (FANCG corrected, FANCG parental and R22p FANCG stable)  
482 were seeded in 8 well tissue culture plates with respective blank and controls for twenty-four hrs.  
483 The DNA damaging agents (MMC, Cisplatin, H<sub>2</sub>O<sub>2</sub> and Formaldehyde, their concentrations were  
484 mentioned as below) were added to each well and incubated for 24 hrs. 0.1 mL of 0.4% solution  
485 of Trypan blue in buffered isotonic salt solution, pH 7.2 to 7.3 (i.e., phosphate-buffered saline)  
486 (Himedia) was added to 1 mL of cells. These cells were loaded on a hemocytometer and the cells  
487 were counted in each well for the number of blue staining cells and the number of total cells. Cell  
488 viability nearly 95% maintained for healthy log-phase cultures. In order to calculate the number  
489 of viable cells per mL of culture the formula below was used.

$$\% \text{ viable cells} = [1.00 - (\text{Number of blue cells} \div \text{Number of total cells})] \times 100$$

$$\text{Number of viable cells} \times 10^4 \times 1.1 = \text{cells/mL culture}$$

490 The viable cells were used for the preparation of the graph at each concentration of the drug.  
491 Triplicate experiments were performed for each concentration.

#### 492 **Cell Cytotoxicity Test by MTT assay:**

493 An equal number of cells (FANCG corrected, FANCG parental and R22P FANCG stable) were  
494 seeded into 96 well tissue culture plates with respective blank and control and incubated for  
495 twenty-four hrs. The DNA damaging agents (MMC, Cisplatin, H<sub>2</sub>O<sub>2</sub> and Formaldehyde, their  
496 concentrations were mentioned as below) were added to each well and mix by gently rocking  
497 several times and incubated for 48 hrs. 20µl of MTT reagent (Thiazolyl Blue Tetrazolium  
498 Bromide) at 5mg/ml concentration in sterile PBS (Himedia) was added to each well and mixed by  
499 gentle rocking and incubated for 1 hour. The media was removed without disturbing cells and  
500 purple precipitate. 200µl of DMSO was added for solubilization of the purple precipitate  
501 formazan. The plate was shaken at 150rpm for 10 minutes for equal mixing the formazan into the  
502 solvent. The optical density of the solution was observed at 570nm on the ELIZA plate reader.

#### 503 **GammaH2Ax foci Assay:**

504 FANCG corrected(FG<sup>+/+</sup>), FANCG parental (FG<sup>-/-</sup>) and FANCG mutant (R22P) fibroblast cells  
505 were plated onto Poly-L-Lysine coated coverslips in 60mm dishes in DMEM with 15%(v/v) FBS  
506 and 1X penicillin/streptomycin solution and were kept in 5% CO<sub>2</sub> incubator followed by serum  
507 starvation upon achieving nearly 60 to 70 percent confluency. These cells were treated with H<sub>2</sub>O<sub>2</sub>  
508 (10µM) in serum-free DMEM for continuous fourteen hrs followed by MMC (100nM) treatment  
509 for 30min in every 2hr interval. Treated cells were incubated with rabbit polyclonal anti-phospho-  
510 gamma H2AX antibody (ab11174). Goat-anti-rabbit IgG daylight secondary antibody (Thermo)  
511 was used for 1 hour followed by DAPI staining and foci were calculated under a microscope  
512 (Axio observer.Z1, Carl Zeiss MicroImaging, Germany) equipped with Axiocam HRM CCD  
513 camera and Apotome.2. Axiovisionsoftware (Zenpro2012).

#### 514 **Determination of mitochondrial membrane potential loss with JC dye:**

515 Same FANCG fibroblast cells which were analyzed for the GammaH2Ax foci have also analysed  
516 for the mitochondrial membrane potential. At every two hrs after treatment with MMC, the cells  
517 were stained with 1XJC1 dye solubilised in DMSO for 10 minutes. Then the cover slips were air  
518 dried and mounted with Vectashield mounting medium. The mounted cells kept in dark for 15  
519 minutes and fixed the cover slip with transparent nail polish. These cells were observed under  
520 Zeiss microscope with DAPI, FITC and PI filters for mitochondrial membrane potential change  
521 and deconvoluted images captured with Fluorescence microscope (Zeiss Axio observer.Z1) fitted  
522 with Axiocam observer camera. Red color represents the stable mitochondria. Green represents  
523 the loss of mitochondrial potentiality. Yellow is the in-between status of red and green.

#### 524 **In vivo iron uptake assay of FANCG**(Pierik et al., 2009)

525 Fibroblast cells (FANCG corrected, FANCG parental and R22P stable cell) were grown at 37°C  
526 with 5% CO<sub>2</sub> in Iscove's Modified Dulbecco's Medium (IMDM, Sigma) supplemented with 15%

527 (v/v) fetal bovine serum(FBS, Gibco), and 1X penicillin/streptomycin solutions(Gibco) for 24hr.  
528 Followed by second incubation for 2hr in IMDM containing 15% (v/v) FBS,1X pen-strep and  
529 10 $\mu$ Ci <sup>55</sup>Fe (BARC, India).Following the serum starvation in IMDM containing 10 $\mu$ Ci <sup>55</sup>Fe for  
530 2hr, these cells were treated with H<sub>2</sub>O<sub>2</sub>(10 $\mu$ M) in serum-free IMDM for continuous fourteen hrs  
531 followed by MMC (100nM) treatment for 30min in every 2hr interval. Cells were collected,  
532 washed three times with 1X PBS and were lysed in IP lysis buffer (25mM HEPES, 100mM NaCl,  
533 1mM EDTA, 10% (v/v) glycerol, 1%(v/v) NP-40) supplemented with 1mM PMSF  
534 (phenylmethylsulfonyl fluoride), 10mM DTT (dithiothreitol), 1mM sodium  
535 orthovanadate,10ng/mL leupeptin, 1ng/mL aprotinin. Approx 700 $\mu$ g cell lysate was incubated  
536 with 4-5 $\mu$ l of IP grade polyclonal FANCI antibody (Abcam) and ferritin antibody (Sigma) for 1hr  
537 at 4°C. Ferritin was taken as control for iron uptake by cells. 30  $\mu$ l of protein A/G plus agarose  
538 beads (Biobharti, India) was added and incubated at 4°C for overnight under constant  
539 shaking.Beads were washed three to four times with 1X IP lysis buffer. Washed beads were  
540 boiling in 10%(w/v) SDS solution and were mixed with scintillation oil. DPM(disintegration per  
541 minute) of <sup>55</sup>Fe were count in a liquidscintillation counter.

#### 542 **DNA substrate**

543 Standard desalted oligonucleotides were purchased from IDT and were used for the preparation of  
544 DNA substrates. The forked-duplex DNA substrate was prepared from the DC26 and TSTEM25  
545 oligonucleotides as described by(Wu et al., 2010).

#### 546 **FANCI Helicase Assay**

547 Fibroblast cells (FG<sup>+/+</sup>, FG<sup>-/-</sup> and R22P mutants) were grown at 37°C with 5% CO<sub>2</sub> in Dulbecco's  
548 Modified Eagle Medium (DMEM, Gibco) supplemented with 15%(v/v) fetal bovine serum(FBS,  
549 Gibco), and 1X penicillin/streptomycin solutions(Gibco) for 24hr followed by serum starvation in  
550 DMEM for 2hr. These cells were treated with H<sub>2</sub>O<sub>2</sub>(10 $\mu$ M) in serum-free DMEM for continuous  
551 fourteen hrs followed by MMC (100nM)treatment for 30min. In every 2hr interval, Cells were  
552 collected, washed three times with 1X PBS and were lysed in IP lysis buffer (25mM HEPES,  
553 100mM NaCl, 1mM EDTA, 10%(v/v) glycerol, 1%(v/v) NP-40) supplemented with 1mM PMSF  
554 (phenylmethylsulfonyl fluoride), 10mM DTT (dithiothreitol), 1mM sodium  
555 orthovanadate,10ng/mL leupeptin, 1ng/mL aprotinin. Approx 700 $\mu$ g cell lysate was incubated  
556 with 4-5 $\mu$ l of IP grade polyclonal FANCI antibody(Abcam) for 2hr at 4°C, followed by 3hr  
557 incubation with 30  $\mu$ l of protein A/G plus agarose beads (Biobharti, India) at 4°C under constant  
558 shaking. Beads where then collected by centrifugation at 4°C and washed two times with 1X IP  
559 lysis buffer and two times with 1X Helicase buffer (40mM Tris-HCl (pH 7.4), 25mM KCl, 5mM  
560 MgCl<sub>2</sub>, 0.1mg/ml BSA,2% (v/v) Glycerol, 2mM DTT ). Helicase reaction was initiated by

561 incubating FANCI bound washed A/G plus Agarose beads at 37°C for 30min with helicase  
562 reaction mixture containing helicase buffer, 2mM ATP and 0.5nM of DNA substrate.was then  
563 incubated with Helicase buffer, 0.5nM DNA substrate. Reaction were terminated using stop  
564 buffer (0.3% w/v SDS and 10mM EDTA). The reaction product was resolved on nondenaturing  
565 11% (30:1 acrylamide-bisacrylamide) polyacrylamide gel followed by drying and then were  
566 subjected to autoradiography.

#### 567 **RNA isolation,cDNA synthesis and Real-time PCR:**

568 Fibroblast cells (FG<sup>+/+</sup> and R22P mutants) were grown at 37°C with 5% CO<sub>2</sub> in Dulbecco's  
569 Modified Eagle Medium (DMEM, Gibco) supplemented with 15%(v/v) fetal bovine serum(FBS,  
570 Gibco), and 1X penicillin/streptomycin solutions(Gibco) for 24hr followed by serum starvation in  
571 DMEM for 2hr. These cells were treated with H<sub>2</sub>O<sub>2</sub> (10μM) in serum-free DMEM for continuous  
572 twelve hrs., followed by MMC (100nM) treatment for 30min. At every 4hr interval, Cells were  
573 collected by trypsinization. Total RNA was isolated from these harvested cells using Trizol (  
574 Ambion, life technology) and then was stored in -80°C until further use.

575 4μg of above-isolated total RNA was used to prepare cDNA using the Verso cDNA Synthesis Kit  
576 (Thermo scientific), following the manufacturer's protocol. Prepared cDNA was then diluted five  
577 times and 2 ul of this diluted cDNA was used as template for Real-time PCR.

578 Real-time PCR was performed on StepOnePlus Real time PCR system (Applied biosystems)  
579 using the syber green PCR master mixture (Applied biosystems, Thermo Fisher Scientific). The  
580 program was set as follow; Holding Stage; 95°C, 10min, cycling stage; 40 cycle, 95°C, 15sec,  
581 57°C, 1min and 60°C, 1min, Melting curve stage; step and hold, 95°C, 15sec, 60°C, 1min, 95°C,  
582 15min with ramping rate of +0.3°C. β-Actin was used as endogenous control. The Sequence of  
583 Primers used for Real-time is given below. Graph Pad Prism 7 was used to perform multiple t-test  
584 to evaluate the statistical significance, using the Two-stage linear step-up procedure of Benjamini,  
585 Krieger and Yekutieli, with desire FDR(Q) = 5% without assuming a consistent Standard  
586 deviation.

587

588

589

590

591

592

593

| Gene           | NCBI Reference Sequence | Sequence (5'-3')                                        | Amplicon length (bp) |
|----------------|-------------------------|---------------------------------------------------------|----------------------|
| FXN            | NM_000144.4             | F:AGCCATACACGTTTGAGGACTATGA<br>R: ACGCTTAGGTCCACTGGATGG | 149                  |
| NFU1           | NM_015700.3             | F: TCCCCTCTGGCTAGGCAGTTA<br>R:GCAAAGAAGTCCATGATTGTTGCAT | 149                  |
| $\beta$ -Actin | NM_001101.5             | F: GGCCAACCGCGAGAAGAT<br>R: CGTCACCGGAGTCCATCA          | 134                  |

### Chromosome Preparation :

Fibroblast cells (R22P mutants) were grown at 37°C with 5% CO<sub>2</sub> in Dulbecco's Modified Eagle Medium (DMEM, Gibco) supplemented with 15%(v/v) fetal bovine serum(FBS, Gibco), and 1X penicillin/streptomycin solutions(Gibco) for 24h, followed by serum starvation in DMEM for 2hr. These cells were treated with either MMC (100nM) or H<sub>2</sub>O<sub>2</sub> (300 $\mu$ M) and MMC (100nM) in serum-free DMEM for continuous two hrs, Followed by colcimeid (200 $\mu$ g/ml) treatment for 1hr. These cells were harvested by trypsinization and were treated with KCl (75mM) for 30min, followed by 10min treatment in fixative (1 part acetic acid and 3 part methanol). Cells were then spread on cold glass slides by dropping method followed by continuous flush with 1ml fixative for two times. Slides were air dried and then mounted with mounting medium containing DAPI (Vectashield). The mounted slides were kept in dark for 15 minutes. Imaging was performed on a fluorescence microscope (Axio observer.Z1, Carl Zeiss Micro-Imaging, Germany) attached with Axiocam HRM CCD camera and Apotome.2. Axiovision software (Zenpro2012).

### Declaration of interests

The authors declare no competing interests.

### Author's contributions

JC and BSK performed the experiments. KM and SG studied the FA mutations. RBM and SKM helped the iron uptake experiment. SSM planed the project and made the manuscript.

### Acknowledgments

We thank Dr. Agata Smogorzewska for providing the FA cell lines. Thanks to Jeffrey M. Rosen, Giovanni Pagano, K. Aikat, A. Bhattacharya for critical reading of the manuscript. This work was supported by Department of Biotechnology, Govt. of India. NIT Durgapur supported the fellowship to JC Bose K and BSK. Authors are thankful to DST-FIST for instrument grant to the Department of Biotechnology, NIT Durgapur. This work does not have any financial conflict of interest.

## References and Notes

- Backes, S., Hess, S., Boos, F., Woellhaf, M.W., Gödel, S., Jung, M., Mühlhaus, T., and Herrmann, J.M. (2018). Tom70 enhances mitochondrial preprotein import efficiency by binding to internal targeting sequences. *J. Cell Biol.*
- Bannai, H., Tamada, Y., Maruyama, O., Nakai, K., and Miyano, S. (2002). Extensive feature detection of N-terminal protein sorting signals. *Bioinformatics* 18, 298–305.
- Biederbick, A., Stehling, O., Rosser, R., Niggemeyer, B., Nakai, Y., Elsasser, H.-P., and Lill, R. (2006). Role of Human Mitochondrial Nfs1 in Cytosolic Iron-Sulfur Protein Biogenesis and Iron Regulation. *Mol. Cell. Biol.* 26, 5675–5687.
- Bluteau, D., Masliah-Planchon, J., Clairmont, C., Rousseau, A., Ceccaldi, R., D’Enghien, C.D., Bluteau, O., Cucuini, W., Gachet, S., De Latour, R.P., et al. (2016). Biallelic inactivation of REV7 is associated with Fanconi anemia. *J. Clin. Invest.* 126, 3580–3584.
- Brosh, R.M., and Cantor, S.B. (2014). Molecular and cellular functions of the FANCD1 DNA helicase defective in cancer and in Fanconi anemia. *Front. Genet.* 5.
- D., A.A., Jason, G., Kanan, P., Dev, B.S., A., B.M., Indira, K., Hildegard, S., Stephan, L., Ricardo, P., F., G.P., et al. (2003). Spectrum of sequence variation in the FANCG gene: An International Fanconi Anemia Registry (IFAR) study. *Hum. Mutat.* 21, 158–168.
- Flury, F., Von Borstel, R.C., and Williamson, D.H. (1976). Mutator activity of petite strains of *Saccharomyces cerevisiae*. *Genetics* 83, 645–653.
- Guo, M., Vidhyasagar, V., Ding, H., and Wu, Y. (2014). Insight into the roles of helicase motif Ia by characterizing fanconi anemia group J protein (FANCD1) patient mutations. *J. Biol. Chem.* 289, 10551–10565.
- Guo, M., Vidhyasagar, V., Talwar, T., Kariem, A., and Wu, Y. (2016). Mutational analysis of FANCD1 helicase. *Methods* 108, 118–129.
- Ichim, G., Lopez, J., Ahmed, S.U., Muthalagu, N., Giampazolias, E., Delgado, M.E., Haller, M., Riley, J.S., Mason, S.M., Athineos, D., et al. (2015). Limited Mitochondrial Permeabilization Causes DNA Damage and Genomic Instability in the Absence of Cell Death. *Mol. Cell* 57, 860–872.
- Kaniak-Golik, A., and Skoneczna, A. (2015). Mitochondria-nucleus network for genome stability. *Free Radic. Biol. Med.* 82, 73–104.
- Kispal, G., Csere, P., Prohl, C., and Lill, R. (1999). The mitochondrial proteins Atm1p and Nfs1p are essential for biogenesis of cytosolic Fe/S proteins. *EMBO J.* 18, 3981–3989.
- Kujoth, G.C., Hiona, A., Pugh, T.D., Someya, S., Panzer, K., Wohlgemuth, S.E., Hofer, T., Seo, A.Y., Sullivan, R., Jobling, W.A., et al. (2005). Mitochondrial DNA mutations, oxidative stress,



655 and apoptosis in mammalian aging. *Sci. (New York, NY)* *309*, 481–484.

656 Larman, T.C., DePalma, S.R., Hadjipanayis, A.G., Protopopov, A., Zhang, J., Gabriel, S.B., Chin,  
657 L., Seidman, C.E., Kucherlapati, R., and Seidman, J.G. (2012). Spectrum of somatic  
658 mitochondrial mutations in five cancers. *Proc. Natl. Acad. Sci.* *109*, 14087–14091.

659 Li, K., Singh, A., Crooks, D.R., Dai, X., Cong, Z., Pan, L., Ha, D., and Rouault, T.A. (2010).  
660 Expression of human frataxin is regulated by transcription factors SRF and TFAP2. *PLoS One*.

661 Lill, R., and Mühlhoff, U. (2008). Maturation of Iron-Sulfur Proteins in Eukaryotes:  
662 Mechanisms, Connected Processes, and Diseases. *Annu. Rev. Biochem.* *77*, 669–700.

663 Lill, R., Hoffmann, B., Molik, S., Pierik, A.J., Rietzschel, N., Stehling, O., Uzarska, M.A.,  
664 Webert, H., Wilbrecht, C., and Mühlhoff, U. (2012). The role of mitochondria in cellular iron-  
665 sulfur protein biogenesis and iron metabolism. *Biochim. Biophys. Acta - Mol. Cell Res.*

666 Mackenzie, E.L., Iwasaki, K., and Tsuji, Y. (2008). Intracellular iron transport and storage: From  
667 molecular mechanisms to health implications. *Antioxidants Redox Signal*.

668 Mukhopadhyay, S.S., Leung, K.S., Hicks, M.J., Hastings, P.J., Youssoufian, H., and Plon, S.E.  
669 (2006). Defective mitochondrial peroxiredoxin-3 results in sensitivity to oxidative stress in  
670 Fanconi anemia. *J. Cell Biol.* *175*, 225–235.

671 Netz, D.J.A., Mascarenhas, J., Stehling, O., Pierik, A.J., and Lill, R. (2014). Maturation of  
672 cytosolic and nuclear iron-sulfur proteins. *Trends Cell Biol.* *24*, 303–312.

673 Neve, E.P., and Ingelman-Sundberg, M. (2001). Identification and characterization of a  
674 mitochondrial targeting signal in rat cytochrome P450 2E1 (CYP2E1). *J. Biol. Chem.* *276*,  
675 11317–11322.

676 Nickel, C., Horneff, R., Heermann, R., Neumann, B., Jung, K., Soll, J., and Schwenkert, S.  
677 (2018). Phosphorylation of the outer membrane mitochondrial protein OM64 influences protein  
678 import into mitochondria. *Mitochondrion*.

679 Nunnari, J., and Suomalainen, A. (2012). Mitochondria: In sickness and in health. *Cell* *148*,  
680 1145–1159.

681 Pagano, G., Shyamsunder, P., Verma, R.S., and Lyakhovich, A. (2014). Damaged mitochondria  
682 in Fanconi anemia - an isolated event or a general phenomenon? *Oncoscience* *1*, 287.

683 Parmar, K., D'Andrea, A., and Niedernhofer, L.J. (2009). Mouse models of Fanconi anemia.  
684 *Mutat. Res.* *668*, 133–140.

685 PC, N. (1976). The clonal evolution of tumor cell populations. *Science (80- )*. *194*, 23.

686 Philpott, C.C., Rashford, J., Yamaguchi-Iwai, Y., Rouault, T.A., Dancis, A., and Klausner, R.D.  
687 (1998). Cell-cycle arrest and inhibition of G1 cyclin translation by iron in AFT1-1(up) yeast.  
688 *EMBO J.* *17*, 5026–5036.

689 Pierik, A.J., Netz, D.J.A., and Lill, R. (2009). Analysis of iron-sulfur protein maturation in  
690 eukaryotes. *Nat. Protoc.* *4*, 753–766.

691 Pulliam-Leath, A.C., Ciccone, S.L., Nalepa, G., Li, X., Si, Y., Miravalle, L., Smith, D., Yuan, J.,  
692 Li, J., Anur, P., et al. (2010). Genetic disruption of both *Fancc* and *Fancg* in mice recapitulates the  
693 hematopoietic manifestations of Fanconi anemia. *Blood* *116*, 2915–2920.

694 Richardson, D.R., Lane, D.J.R., Becker, E.M., Huang, M.L.-H., Whitnall, M., Rahmanto, Y.S.,  
695 Sheftel, A.D., and Ponka, P. (2010). Mitochondrial iron trafficking and the integration of iron  
696 metabolism between the mitochondrion and cytosol. *Proc. Natl. Acad. Sci.* *107*, 10775–10782.

697 Rosenberg, P.S., Socié, G., Alter, B.P., and Gluckman, E. (2005). Risk of head and neck  
698 squamous cell cancer and death in patients with Fanconi anemia who did and did not receive  
699 transplants. *Blood* *105*, 67–73.

700 Rudolf, J., Makrantonis, V., Inglede, W.J., Stark, M.J.R., and White, M.F. (2006). The DNA  
701 Repair Helicases XPD and FancJ Have Essential Iron-Sulfur Domains. *Mol. Cell* *23*, 801–808.

702 Tokarz, P., and Blasiak, J. (2014). Role of mitochondria in carcinogenesis. *Acta Biochim. Pol.* *61*,  
703 671–678.

704 Veatch, J.R., McMurray, M.A., Nelson, Z.W., and Gottschling, D.E. (2009). Mitochondrial  
705 Dysfunction Leads to Nuclear Genome Instability via an Iron-Sulfur Cluster Defect. *Cell* *137*,  
706 1247–1258.

707 Vives-Bauza, C., Gonzalo, R., Manfredi, G., Garcia-Arumi, E., and Andreu, A.L. (2006).  
708 Enhanced ROS production and antioxidant defenses in cybrids harbouring mutations in mtDNA.  
709 *Neurosci. Lett.* *391*, 136–141.

710 Walden, H., and Deans, A.J. (2014). The Fanconi Anemia DNA Repair Pathway: Structural and  
711 Functional Insights into a Complex Disorder. *Annu. Rev. Biophys.* *43*, 257–278.

712 Wang, Y.T., Chuang, J.Y., Shen, M.R., Yang, W. Bin, Chang, W.C., and Hung, J.J. (2008).  
713 Sumoylation of Specificity Protein 1 Augments Its Degradation by Changing the Localization and  
714 Increasing the Specificity Protein 1 Proteolytic Process. *J. Mol. Biol.*

715 Wilson, J.B., Blom, E., Cunningham, R., Xiao, Y., Kupfer, G.M., and Jones, N.J. (2010). Several  
716 tetratricopeptide repeat (TPR) motifs of FANCG are required for assembly of the BRCA2/D1-  
717 D2-G-X3 complex, FANCD2 monoubiquitylation and phleomycin resistance. *Mutat. Res. -*  
718 *Fundam. Mol. Mech. Mutagen.* *689*, 12–20.

719 Wu, Y., Sommers, J.A., Suhasini, A.N., Leonard, T., Deakyne, J.S., Mazin, A. V., Shin-ya, K.,  
720 Kitao, H., and Brosh, R.M. (2010). Fanconi anemia group J mutation abolishes its DNA repair  
721 function by uncoupling DNA translocation from helicase activity or disruption of protein-DNA  
722 complexes. *Blood* *116*, 3780–3791.

723 Yang, Y., Kuang, Y., De Oca, R.M., Hays, T., Moreau, L., Lu, N., Seed, B., and D'Andrea, A.D.  
724 (2001). Targeted disruption of the murine Fanconi anemia gene, *Fancg/Xrcc9*. *Blood* 98, 3435–  
725 3440.

726  
727  
728  
729  
730  
731  
732  
733  
734  
735  
736  
737  
738  
739  
740  
741  
742  
743  
744  
745  
746  
747  
748  
749  
750  
751  
752  
753  
754  
755  
756  
757  
758  
759  
760  
761  
762  
763  
764  
765  
766  
767  
768  
769  
770  
771

772  
773  
774  
775

## Figures and Tables

### IPSORT Prediction

Predicted as: *having a mitochondrial targeting peptide*

Sequence (Type: nonplant)

1MSRQT TSVG SCLDL WREKIN DRLVR QAKVA QNSGL TLRRQ QLAQD ALEGL  
 51RGLLH SLQGL PAAVP VLPLE LTVTC NFII L RASLA QGFTE DQAQD IQRSL  
 101ERVLE TQEQQ GPRLE QGLRE LWDV L RASC LLPEL LSALH RLVGL QAALW  
 151LSADR LGDLA LLEL LINGSQ SGASK DLLLL LKTWS PPAEE LDAPL TLQDA  
 201QGLKD VLLTA FAYRQ GLQEL ITGNP DKALS SLHEA ASGLC PRPVL VQVYT  
 251ALGSC HRKMG NPQRA LLYLV AALKE GSANG PPLLE ASRLY QQLGD TTAEL  
 301ESLEL LVEAL NVPCS SKAPQ FLIEV ELLLP PPDLA SPLHC GTQSQ TKHIL  
 351ASRCL QTGRA GDAAE HYLDL LALL DSSEP RFSPP PSPPG PCMPE VFLEA  
 401AVALI QAGRA QDALT LCEEL LSRTS SLLPK MSRLN EDARK GTKEL PYCPL  
 451MVSAT HLLQG QAWVQ LGAQK VAISE FSRLC ELLFR ATPEE KEQGA AFNCE  
 501QGCKS DAALQ QLRAA ALISR GLEWV ASGQD TKALQ DFLLS VQMC P GNROT  
 551YFHLL QTLKR LDRRD EATAL WIRLE AQTKG SHEDA LNSLP LYLES YLSWZ  
 601RPSDR DAFLE EFRTS LPKSC DL

Values used for reasoning

| Node               | Answer | View                                               | Substring | Value(s)                                                                            | Plot                 |
|--------------------|--------|----------------------------------------------------|-----------|-------------------------------------------------------------------------------------|----------------------|
| 1. Signal peptide? | No     | Average Hydropathy (KYTJ820101)                    | [6,20]    | -0.6 (>= 0.953? No)                                                                 | <a href="#">show</a> |
| 2. Mitochondrial ? | Yes    | Average Net Charge (KLEP840101)                    | [1,30]    | 0.1 (>= 0.083? Yes)                                                                 | <a href="#">show</a> |
|                    |        | Indexing: A11<br>Pattern: 221121122 (ins/del <= 3) | [1,30]    | MS-RQ--TTSVGSCLDLWREKINDRLVRQAKVA<br>22-12--22220222202210000122122022<br>221121122 | --                   |

776  
777

**A**

| S.No | Species Name                                                | Amino acid Sequence                 | Entry name          | Name of the Gene | S/N        |
|------|-------------------------------------------------------------|-------------------------------------|---------------------|------------------|------------|
| 1    | <b>Homo sapiens (Human)</b>                                 | <b>MSRQTTSVGS SCLDLWREKNDRQAKVA</b> | <b>C9JSE3_HUMAN</b> | <b>FANCG</b>     | <b>YES</b> |
| 2    | Mus musculus (Mouse)                                        | MSSQVIPALP KTFSSSLDW REKNDQLVRQ     | FANCG_MOUSE         | Fancg            | NO         |
| 3    | Mus musculus (Mouse)                                        | MSSQVIPALP KTFSSSLDW REKNDQLVRQ     | A4QPC9_MOUSE        | Fancg            | NO         |
| 4    | Mus musculus (Mouse)                                        | MSSQVIPALP KTFSSSLDW REKNDQLVRQ     | Q80X51_MOUSE        | Fancg            | NO         |
| 5    | Mus musculus (Mouse) Fanconi anemia complementation group G | MSSQVIPALP KTFSSSLDW REKNDQLVRQ     | Q8VHS1_MOUSE        | Fancg            | NO         |
| 6    | Mus musculus (Mouse)                                        | MSSQVIPALP KTFSSSLDW REKNNQLVRQ     | B9EJ17_MOUSE        | Fancg            | NO         |
| 7    | Xenopus laevis (African clawed frog)                        | MAGDCLTLWM EENNVIQW RDSASYANTF      | A6Y874_XENLA        | Fancg            | NO         |
| 8    | Xenopus laevis (African clawed frog)                        | MAGLPATPQS LPELSVLYN MLIFHIHSTS     | A6YGN3_XENLA        | Fancg            | NO         |
| 9    | Xenopus tropicalis (Western clawed frog)                    | MAGDCLTLWL EENNVIQW QGSTSCANTP      | B0JZT3_XENTR        | Fancg            | NO         |
| 10   | Cricetulus griseus (Chinese hamster)                        | MSSQIMSALS QTSSSLDLW KDKNDRLVEQ     | Q9EQS1_CRIGR        | FancG            | NO         |
| 11   | Rattus norvegicus (Rat)                                     | MSSQIIPSLP KTFSSSLDW REKNDQLVRQ     | D3ZQI5_RAT          | Fancg            | NO         |
| 12   | Danio rerio (Zebrafish) (Brachydanio rerio)                 | MSVIPCLVDR WSEENNNIL AWKQNEQSLQ     | Q70YH6_DANRE        | Fancg            | NO         |
| 13   | Danio rerio (Zebrafish) (Brachydanio rerio)                 | MSVIPCLADR WSEENNNIL AWKQNERSLQ     | A2CE52_DANRE        | fancg            | NO         |
| 14   | Oryzias latipes (Medaka fish) (Japanese ricefish)           | MNQQQSLFDY WTEENNELVR NCKEQNAVG     | Q70LG7_ORYLA        | Fancg            | NO         |
| 15   | Gallus gallus (Chicken)                                     | MKRLRCGTAP EPGCLQAWAA ECEALAGRWR    | Q7SZH6_CHICK        | FANCG            | NO         |
| 16   | Fanconi anemia, complementation group G Bos taurus (Bovine) | MAHQTPGSS ASHVSCLDLW REKNDQLVRQ     | A7E3X0_BOVIN        | FANCG            | NO         |

778  
779

**B**

```

tr|Q568X1|Q568X1_DANRE      MSVIPCLADRUSEENN--NIILAWKQ-NERSLQ----- 30
tr|A2CE52|A2CE52_DANRE      MSVIPCLADRUSEENN--NIILAWKQ-NERSLQ----- 30
sp|O15287|FANCG_HUMAN        MSR-QT-TS-VG---S--SCLDLWREKNDRQAKVA 30
tr|Q53XM5|Q53XM5_HUMAN        MSR-QT-TS-VG---S--SCLDLWREKNDRQAKVA 30
sp|Q9EQR6|FANCG_MOUSE        MSS-QVIPA-LPKTFS--SSLDLWREKNDQLVRQ---- 30
tr|B9EJ17|B9EJ17_MOUSE        MSS-QVIPA-LPKTFS--SSLDLWREKNNQLVRQ---- 30
tr|D3ZQI5|D3ZQI5_RAT          MSS-QIIPS-LPKTFS--SSLDLWREKNDQLVRQ---- 30
tr|Q9EQS1|Q9EQS1_CRIGR        MSS-QIMSA-LSQTSS--STLDLWKDKNDRLVEQ---- 30
tr|A7E3X0|A7E3X0_BOVIN        MAH-QT-P--LGSSASHVSCLDLWREKNDQLVRQ---- 30
tr|A6Y874|A6Y874_XENLA        MAG-DCLTLWMEEN-N--VIVNQWRD-SASYANTF--- 30
tr|B0JZT3|B0JZT3_XENTR        MAG-DCLTLWLEEN-N--VIVSQWQG-STSCANTP--- 30
tr|Q70LG7|Q70LG7_ORYLA        MNQQQSLFDYWTEENN--ELVRNCKE-GQNAVG----- 30
tr|Q7SZH6|Q7SZH6_CHICK        MKRLRC-GT-APE--P--GCLQAWAAECEALAGRWR-- 30
tr|A6YGN3|A6YGN3_XENLA        MAGLPATPQSLPL--E--LSV-LYNMLIFHIHSTS--- 30

```

780  
781

**C**



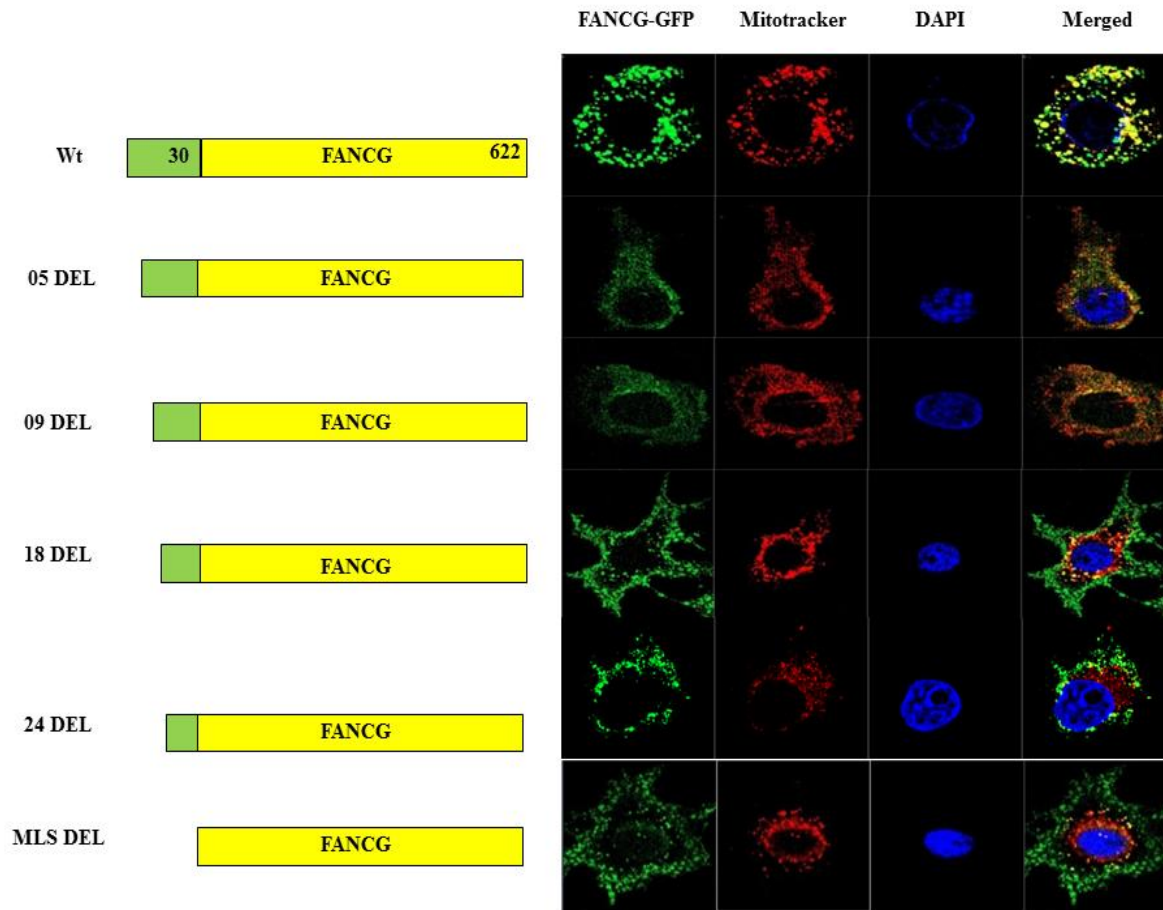

782  
783 **D**  
784 **Fig.1. Identification of Mitochondrial Localization Signal of human FANCG.** iPsort analysis of  
785 the (A) human FANCG (highlighted sequences are the predicted as MLS) and (B) only N-terminal sequences of  
786 FANCG from various species including human.(C) Analysis the conserved amino acids among the N-terminal region  
787 of the FANCG. (D) Co-localization studies of hFANCG-GFP and mitotracker in HeLa cells. Wt= wild type, 05DEL=  
788 five amino acids deleted, 09DEL= nine amino acids deleted, 18DEL= eighteen amino acids deleted, 24DEL= twenty  
789 four amino acids deleted and MLSDEL= entire MLS deleted. DAPI represents the nucleus.



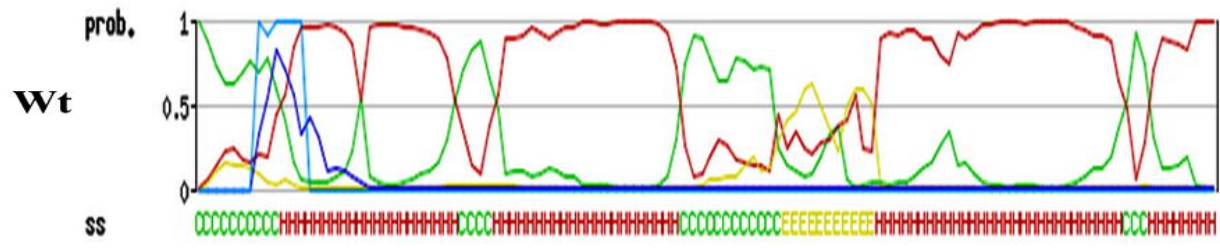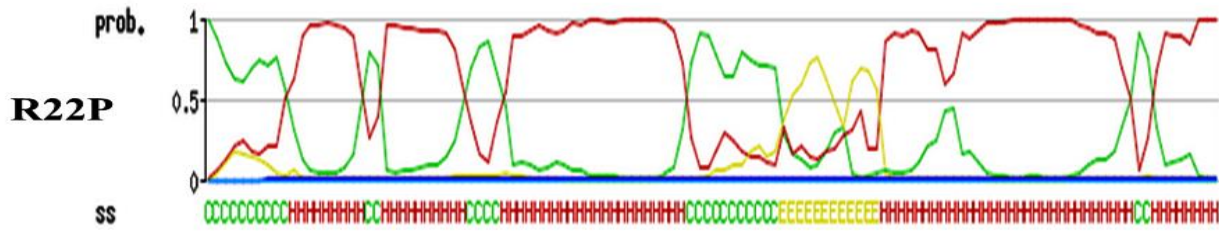

790  
791 A

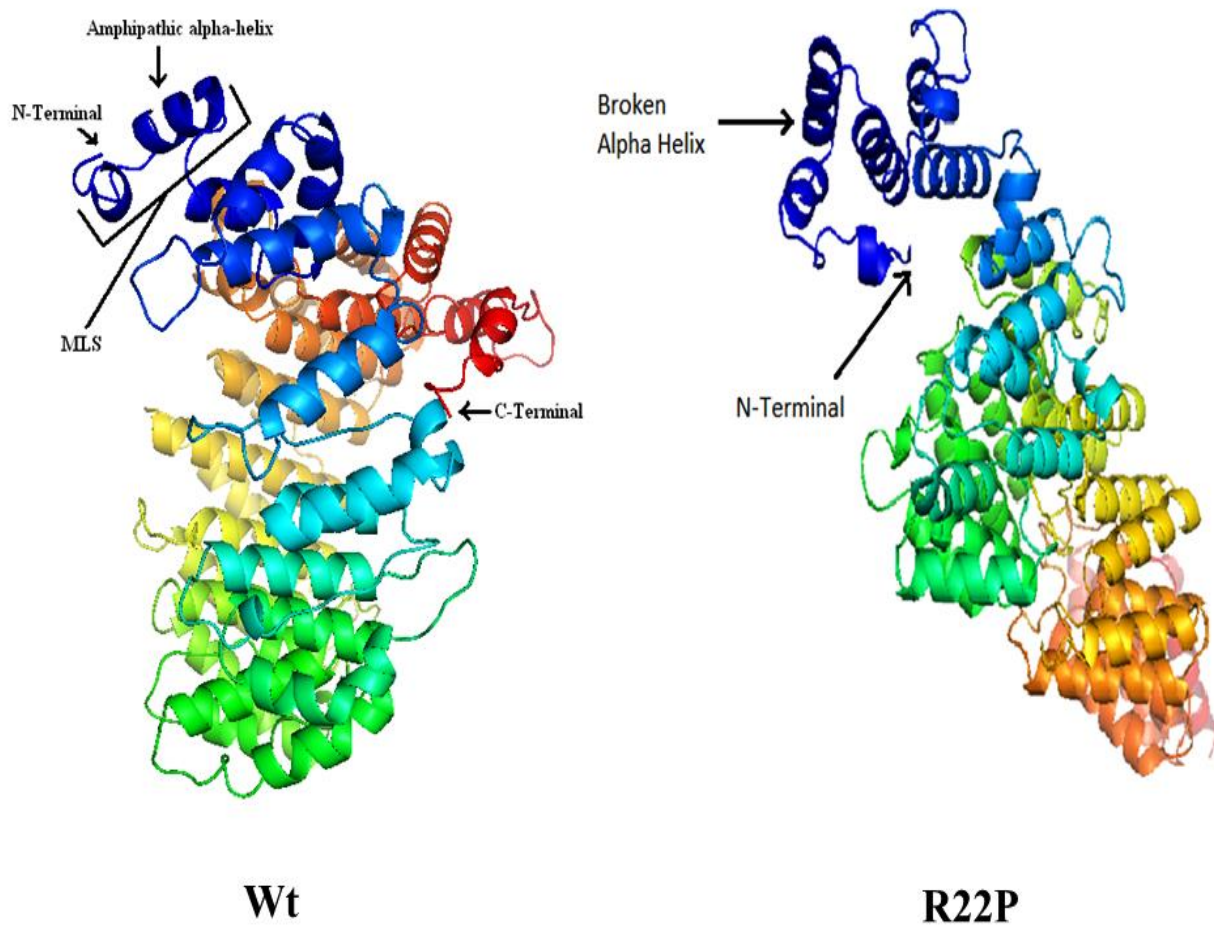

792  
793 B

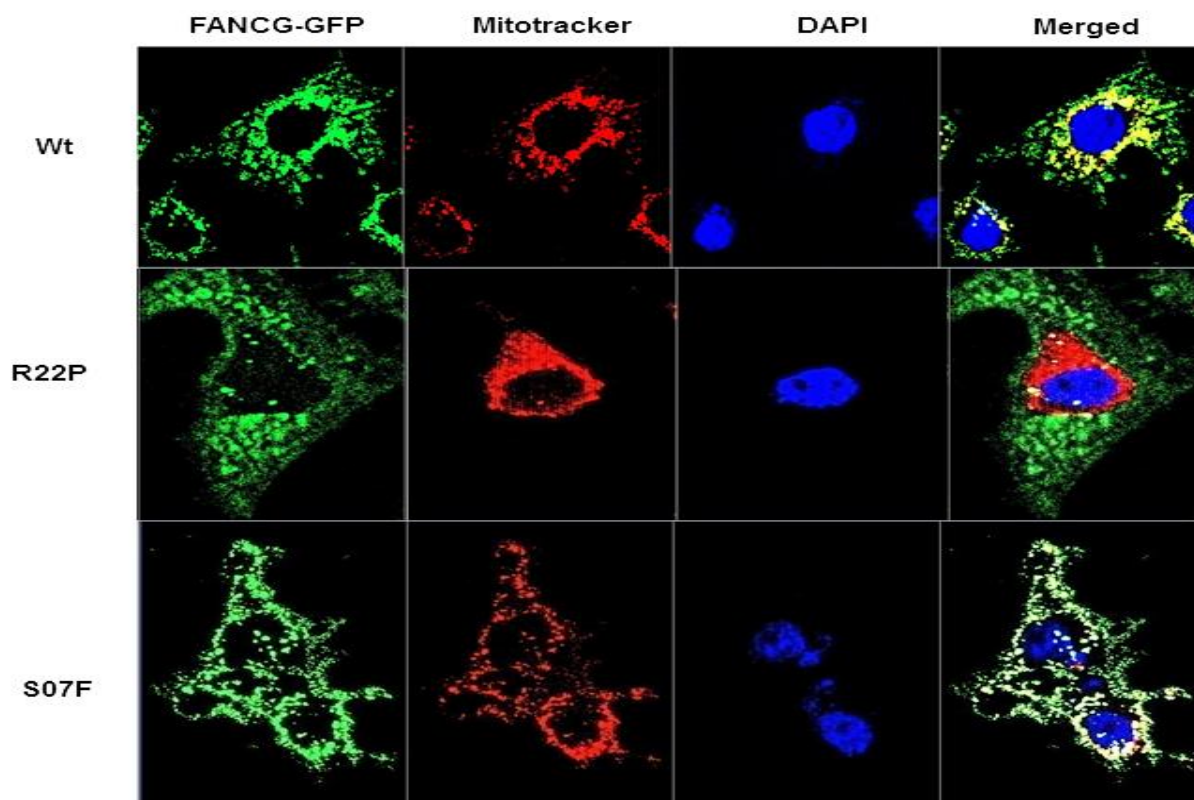

794

795 C

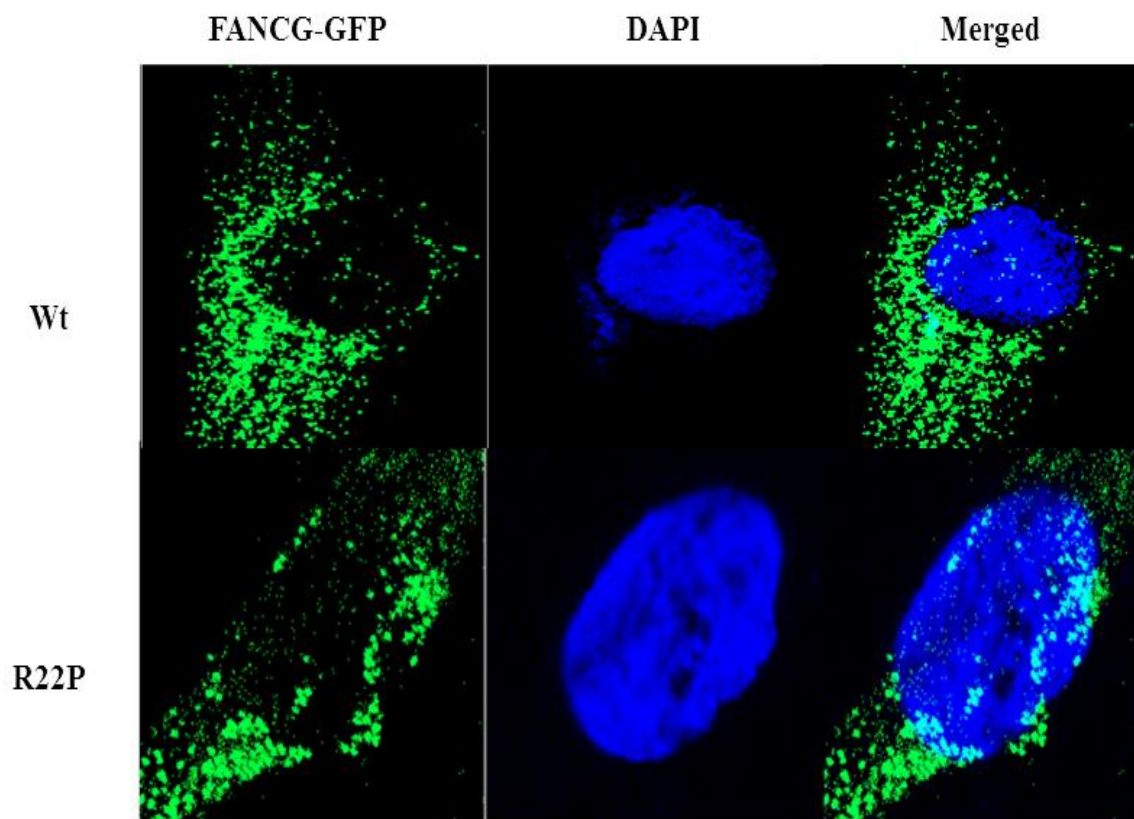

796

797 D

798 **Fig.2. Localization of FANCG R22P in HeLa cells.** (A) Secondary structure and (B) modelled 3D  
799 structure of wild type and R22P FANCG. (C) Co-localization of wild type (Wt), R22P and S07F of FANCG and  
800 mitotracker in HeLa cells. (D) Nuclear localization of wt and R22P in HeLa cells treated with MMC.

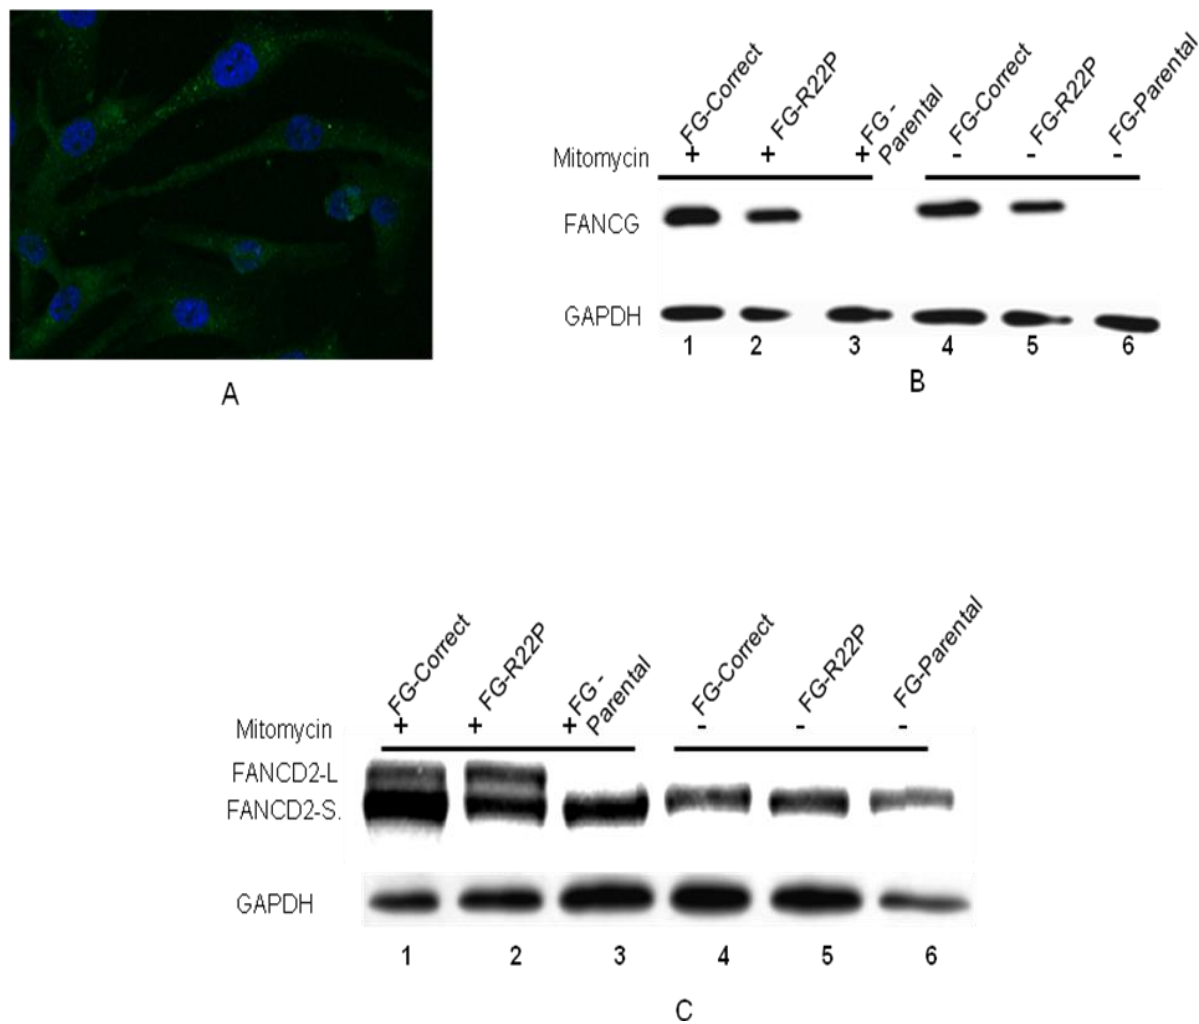

801  
802 **Fig.3. Development of FANCG R22P stable cell line.** R22P construct was stably integrated into the  
803 genome of FANCG parental cell by Lenti vector pLJM1-EGFP (Addgene). (A) GFP expression confirms the stable  
804 expression of R22P in FANCG parental cell. (B) Cells were treated with (lane 1, 2 and 3) and without (4,5 and 6)  
805 MMC and cell lysates were used for Western blot with FANCG antibody. Expression of FANCG R22P was  
806 confirmed in the stable cell (lane 2&5). (C) FANCD2 monoubiquitination studies of the FANCG corrected, FG-R22P  
807 and FG-parental cells. Cells were treated with (lane 1,2 and 3) and without (4, 5 and 6) MMC and blotted with  
808 FANCD2 antibody. FANCD2-L represents the monoubiquitinated and FANCD2-S represents the normal FANCD2  
809 proteins.

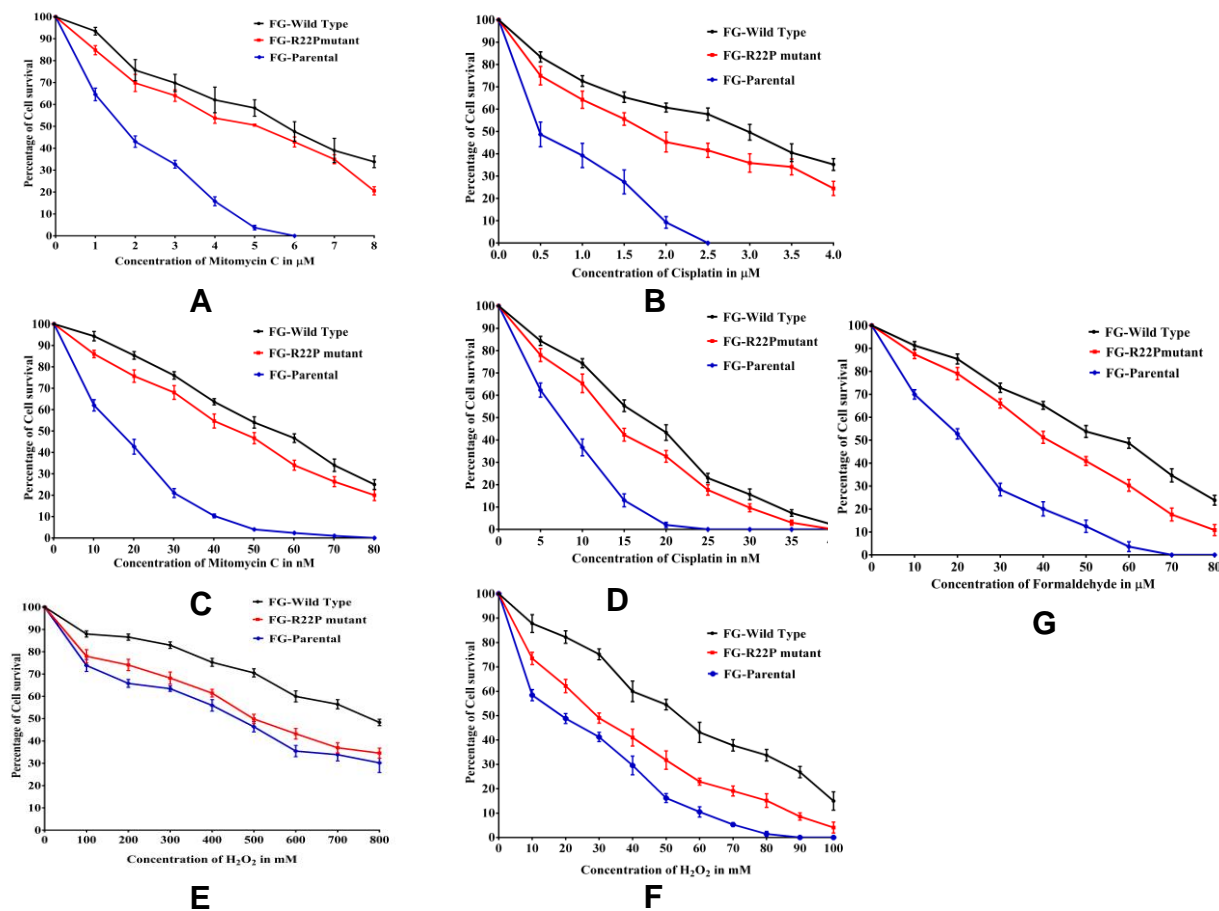

810

811

812

813

814

815

**Fig. 4. Drug sensitivity studies of FANCG corrected (black), FANCR22P (red) and FANCG parental cells (blue).** Cells were treated with increasing concentration of drug (MMC and cisplatin) (A & B) for two days, and (C & D) five days, hydrogen peroxide (H<sub>2</sub>O<sub>2</sub>) (E) for two hrs and (F) twenty four hrs and (G) Formaldehyde for two hrs,. Cell survival was determined by MTT assay. Each value is the mean of three experiments.



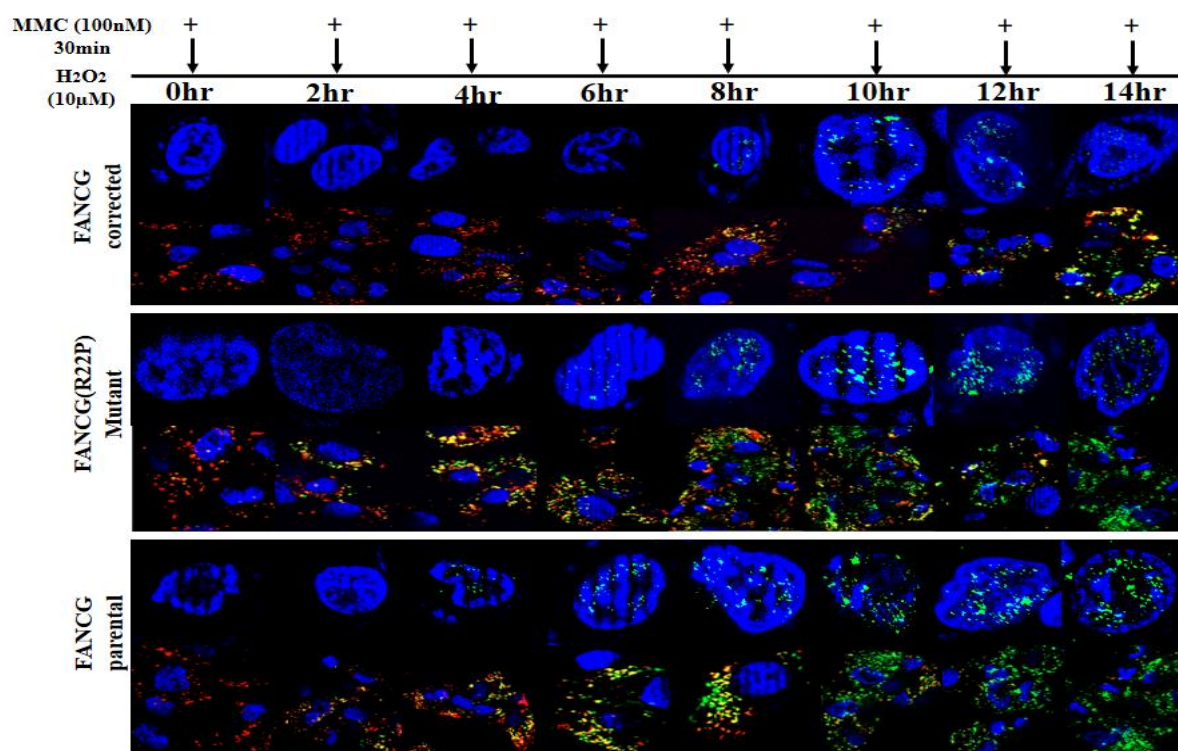

816

817

A

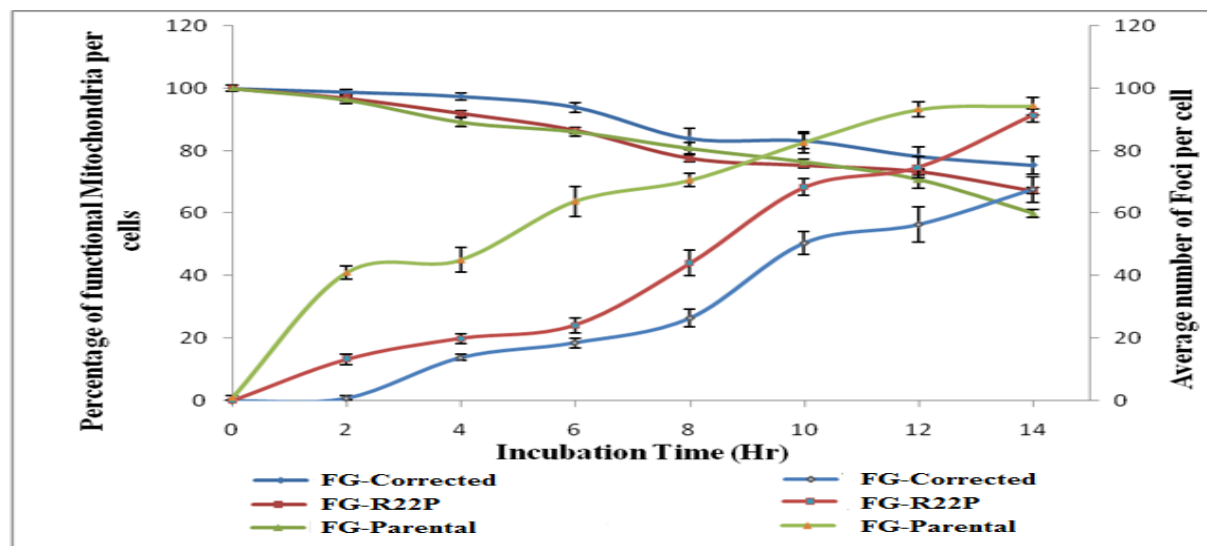

818

819

B

820 **Fig.5. Mitochondrial depolarization and nuclear DNA damage in FG-corrected, FG-**  
 821 **parental and FANCG-R22P cells.** Cells were treated with H<sub>2</sub>O<sub>2</sub> (10µM for fourteen hrs) and MMC (100nM  
 822 for 30 min) at two hr-intervals . Nucleus was stained with γH2AX antibody and mitochondria were stained with JC-1.  
 823 (A) The green dots in the nucleus represent the γH2AX foci. Red colour represents the normal mitochondria, green  
 824 colour represents the depolarized mitochondria and yellow represents the intermediate values. Arrows represent the  
 825 time of MMC treatment.(B) The graph represents the percentage of functional mitochondria and average number of  
 826 foci in each type of cell. The values are the mean of multiple counts (more than three).

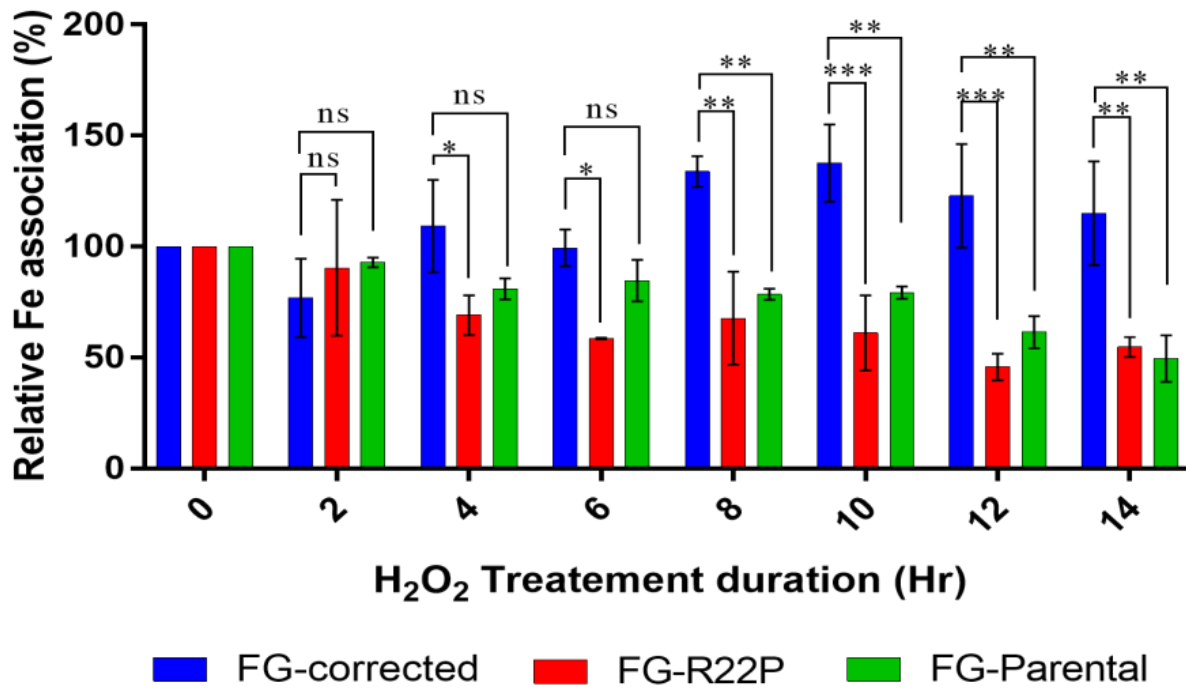

827  
828 A

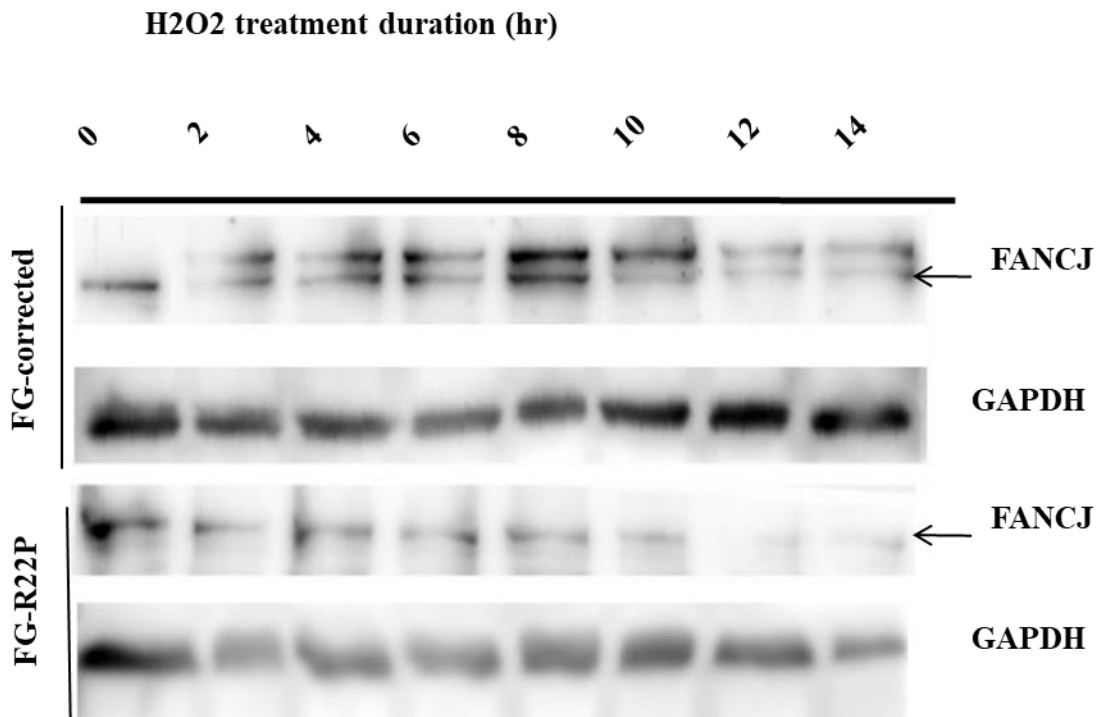

829  
830 B



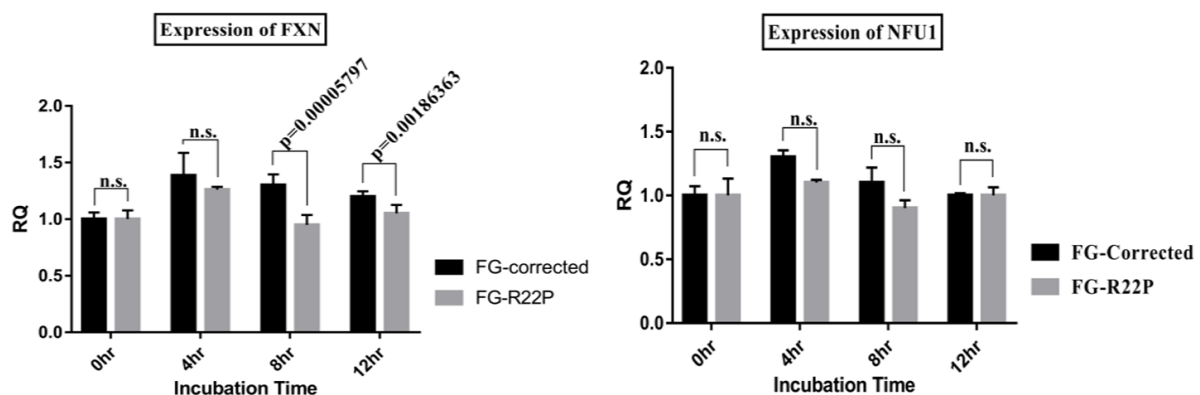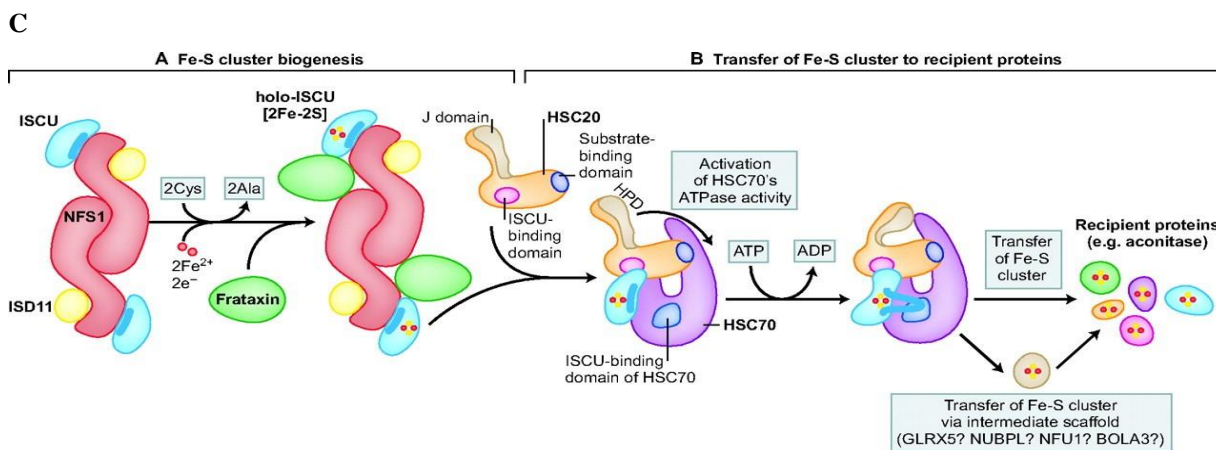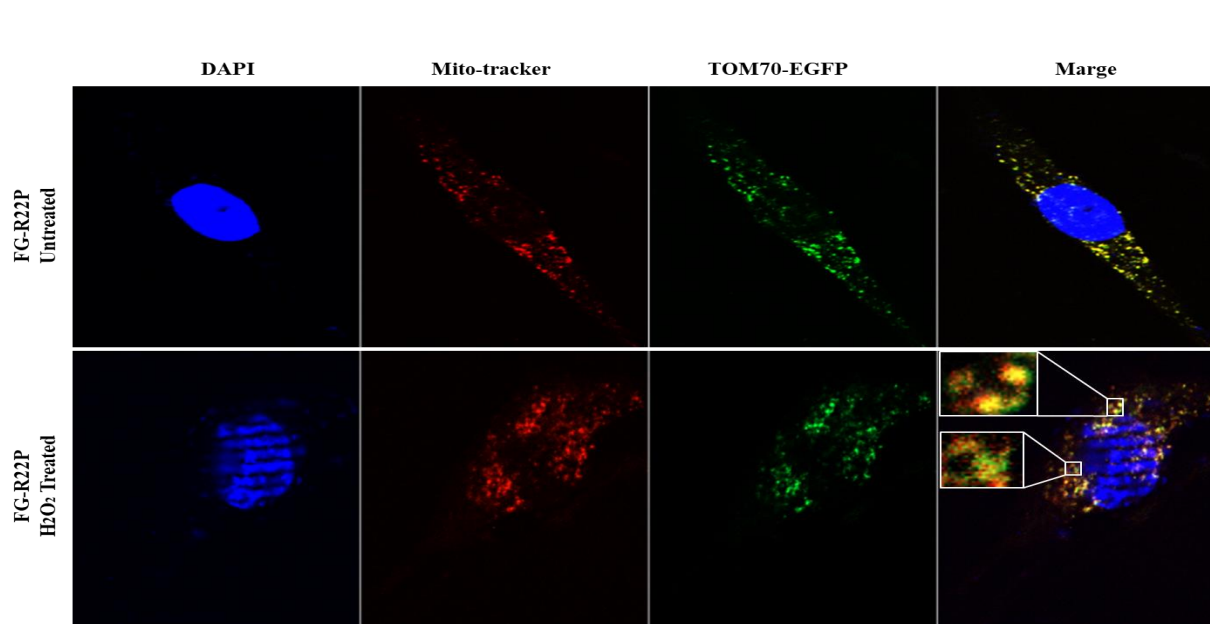

**Fig. 6. Quantification of the amount of iron present in FANCI protein of FG-corrected, FG-parental and FG-R22P cells. (A)** Amount of  $^{55}\text{Fe}$  at 0 hr was considered as hundred and relative amount of  $^{55}\text{Fe}$  was calculated at each time point. Each result is the mean of minimum three experiments. (ns = non-significant,  $*=0.01 < p < 0.05$ ,  $**=0.0001 < p < 0.0009$ ,  $***=p \leq 0.0001$  for  $\alpha=0.05$ ) **(B)** Western blot of the cell lysates with FANCI and GAPDH antibody. **(C)** mRNA expression of FXN and NFU1 at different time points. **(D)** Diagram of Fe-S cluster biogenesis and transfer to recipient proteins. **(E)** Co-localization of TOM70-GFP and Mitotracker in HeLa cell.

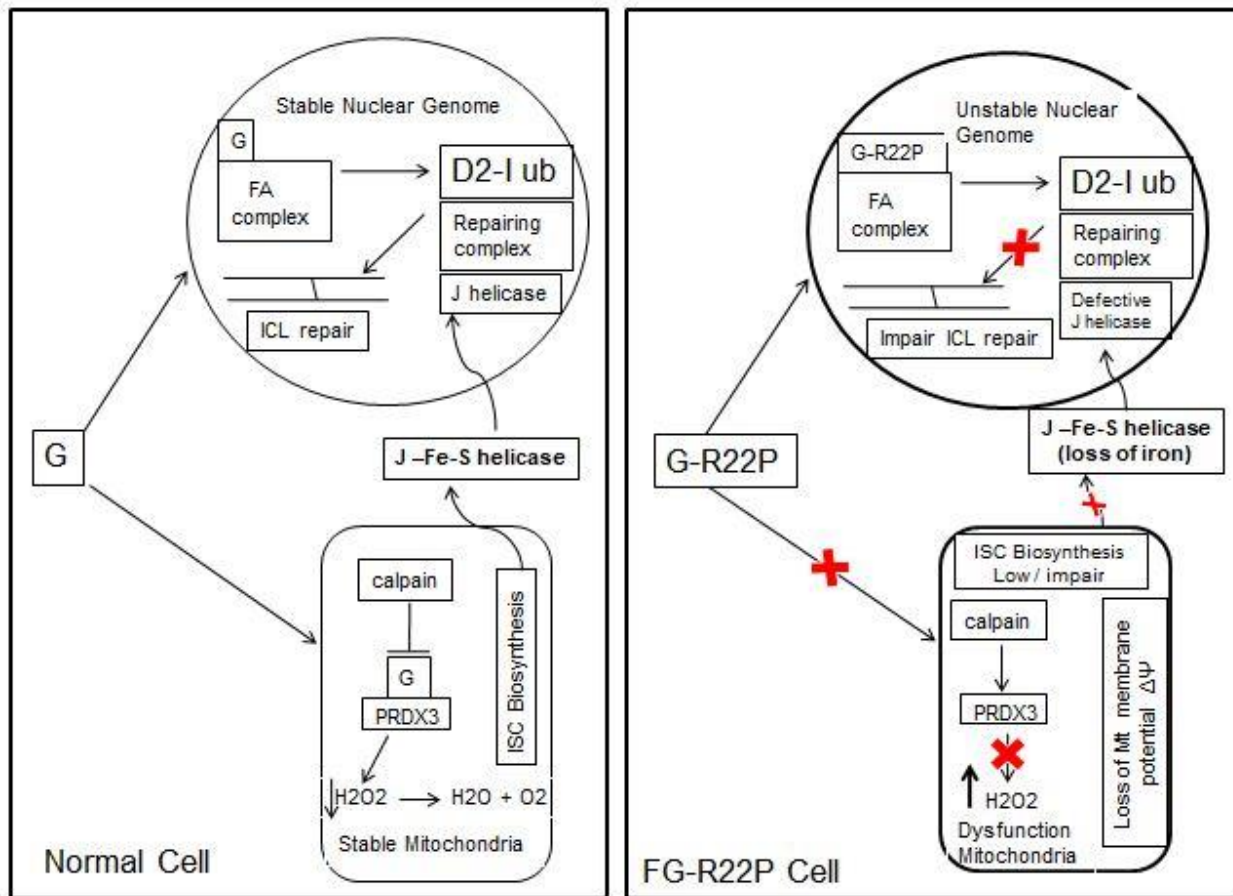

843

844

845

846

847

848

849

850

851

852

853

854

**Figure 7. Model to Explain the mitochondrial instability leads to genomic instability.** (A) In normal cell FANCG prevents PRDX3 from calpain cleavage, and maintains mitochondrial stability by reducing oxidative stress. Stable mitochondria maintain the helicase activity of FANCI by providing ISC domain. (B) In FG-R22P cell FANCG fails to migrate to mitochondria and PRDX3 is cleaved by calpain. Mitochondrial membrane potential ( $\Delta\Psi$ ) is lost due to elevated oxidative stress and ISC biosynthesis is reduced. FANCI lost its helicase activity due to insufficient iron in its Fe-S domain

855  
856  
857

## Supplementary Materials

|                     |                                                                                                                                                                                                                                                                                                                                                                                                                                                                                                                                                                                                                                                            |
|---------------------|------------------------------------------------------------------------------------------------------------------------------------------------------------------------------------------------------------------------------------------------------------------------------------------------------------------------------------------------------------------------------------------------------------------------------------------------------------------------------------------------------------------------------------------------------------------------------------------------------------------------------------------------------------|
| Name of Sequence    | Protein                                                                                                                                                                                                                                                                                                                                                                                                                                                                                                                                                                                                                                                    |
| Input Sequence      | MSRQTTSVGGSSCLDLWREKNDRLVRQAKVAQNSGLTLRRQQLAQDALEGLR<br>GLLHSLQGLPAAPVPLELTVTCNFILRASLAQGFTEDQAQDIQRSLE<br>RVLETQEQGPRLEQGLRELWDSVLRASCLPELLSALHRLVGLQAALWL<br>SADRLGDLALLETLNGSQSGASKDLLLLLKTWSPPAEELDAPLTLQDAQ<br>GLKDVLTLAFAYRQGLQELITGNPKALSSLHEAASGLCPRPVLVQVYTA<br>LGSCHRKMGNPQRALLYLVAALKEGSAWGPPLLEASRLYQQLGDTTAELE<br>SLELLVEALNVPCSSKAPQFLIEVELLLPPDLASPLHCGTQSQTKHILA<br>SRCLQTGRAGDAAEHYLDLLALLDSSEPRFSPSPPGPCMPPEVFLEAA<br>VALIQAGRAQDALTLCEELLSRTSLLPKMSRLWEDARKGKELPYCPLW<br>VSATHLLQGQAWVQLGAQKVAISEFSRCELELLFRATPEEKEQGAAFNCEQ<br>GCKSDAALQQLRAAALISRGLEWVASGQDTKALQDFLLSVQMCPCGNRDY<br>FHLLQTLKRLDRRDEATALWWLEAQTKGSHEDALWSLPLYLESYLSWIR |
| Length of Sequence  | 622                                                                                                                                                                                                                                                                                                                                                                                                                                                                                                                                                                                                                                                        |
| Prediction Approach | Amino acid composition Based                                                                                                                                                                                                                                                                                                                                                                                                                                                                                                                                                                                                                               |

| Score of Different Subcellular Location |              |
|-----------------------------------------|--------------|
| Localization                            | Score        |
| Chloroplast                             | -1.1048213   |
| Cytoplasm                               | -0.78809715  |
| Mitochondria                            | -0.039420906 |
| Nuclear                                 | -0.20893303  |

**Predicted Subcellular Localization**

**Mitochondrial Protein**

858  
859

**A**

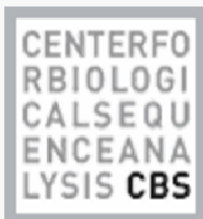

## TargetP 1.1 Server - prediction results

Technical University of Denmark

```
### targetp v1.1 prediction results #####
```

```
Number of query sequences: 1
```

```
Cleavage site predictions not included.
```

```
Using NON-PLANT networks.
```

| Name                 | Len | mTP   | SP    | other | Loc | RC |
|----------------------|-----|-------|-------|-------|-----|----|
| gi_4759336_ref_NP_00 | 622 | 0.212 | 0.052 | 0.725 | _   | 3  |

```
-----  
cutoff                0.200  0.200  0.200
```

B

### iLoc-Animal: Predicting subcellular localization of animal proteins with single or multiple sites

[Home Page](#) | [Read Me](#) | [Citation](#) |

Your Input Sequences :

```
>gi|4759336|ref|NP_004620.1| Fanconi anemia group G protein [Homo sapiens] length: 622  
MSRQTTSVGSCLDLWREKNDRLVLRQAKVAQNSGLTLRRQQLAQDALEGLRGLLHSLQGLPA
```

Predicted Result:

Protein gi|4759336|ref|NP\_004620.1| Fanconi anemia group G protein [Homo sapiens] may locate in:  
**mitochondrion**

C

865 **Fig.S1. Insilico analysis of human FANCG for mitochondrial localization.** (A)RSLpred score (cut  
 866 off>-0.394209), (B) TargetP1.1 server score (0.212< cut off) and (C) iLOC-Animal results suggest mitochondrial  
 867 localization.  
 868

| PROTEIN | TargetP 1.1 |    | MitoProt II - v1.101 |        | iPSORT |     | Predotar | TPpRED2.0 |       |
|---------|-------------|----|----------------------|--------|--------|-----|----------|-----------|-------|
|         | mTP         | RC | probability          | Charge | SP     | MLS |          |           |       |
| FG-WT   | 0.212       | 3  | 0.4080               | -27    | NO     | YES | 0.02     | NO        | 0.922 |
| FG-R22P | 0.119       | 2  | 0.4050               | -16    | NO     | NO  | 0.00     | NO        | 0.879 |

| FA Protein | RSLpred<br>In Mito. | ILoc-Animal |         | MultiLoc  |           |
|------------|---------------------|-------------|---------|-----------|-----------|
|            |                     | Mito.       | Nucleus | SVMTarget | SVMaac    |
| FG-WT      | -0.394209           | YES         | Yes     | 0.140140  | -0.934851 |
| FG-R22P    | -0.090136           | YES         | Yes     | 0.079546  | -0.936037 |

869  
 870 **A**

### iPSORT Prediction

**Predicted as: *having a mitochondrial targeting peptide***

Sequence (Type: nonplant)

1 MSRQT TTVGS SCLDL WREKN DRLVR QAKVA QNSGL TLRRQ QLAQD ALEGL  
 51 RGLLH SLQGL PAAVP VLPLE LTVTC NFIIIL RASLA QGFTE DQAQD IQRSL  
 101 ERVLE TQEQQ GPRLE QGLRE LWDSV LRASC LLPPEL LSALH RLVGL QAALW  
 151 LSADR LGDLA LLELET LNGSQ SGASK DLLLL LKTWS PPAEE LDAPL TLQDA  
 201 QGLKD VLLTA FAYRQ GLQEL ITGNP DKALS SLHEA ASGLC PRPVL VQVYT  
 251 ALGSC HRKMG NPQRA LLYLV AALKE GSAWG PPLLE ASRLY QQLGD TTAEL  
 301 ESLEL LVEAL NVPCS SKAPQ FLIEV ELLLP PPDLA SPLHC GTQSQ TKHIL

**Predicted as: *not having signal or mitochondrial targeting peptide***

Sequence (Type: nonplant)

1 MSRQT TSVGS SCLDL WREKN PEVR QAKVA QNSGL TLRRQ QLAQD ALEGL  
 51 RGLLH SLQGL PAAVP VLPLE LTVTC NFIIIL RASLA QGFTE DQAQD IQRSL  
 101 ERVLE TQEQQ GPRLE QGLRE LWDSV LRASC LLPPEL LSALH RLVGL QAALW  
 151 LSADR LGDLA LLELET LNGSQ SGASK DLLLL LKTWS PPAEE LDAPL TLQDA  
 201 QGLKD VLLTA FAYRQ GLQEL ITGNP DKALS SLHEA ASGLC PRPVL VQVYT  
 251 ALGSC HRKMG NPQRA LLYLV AALKE GSAWG PPLLE ASRLY QQLGD TTAEL  
 301 ESLEL LVEAL NVPCS SKAPQ FLIEV ELLLP PPDLA SPLHC GTQSQ TKHIL

871  
 872 **B**



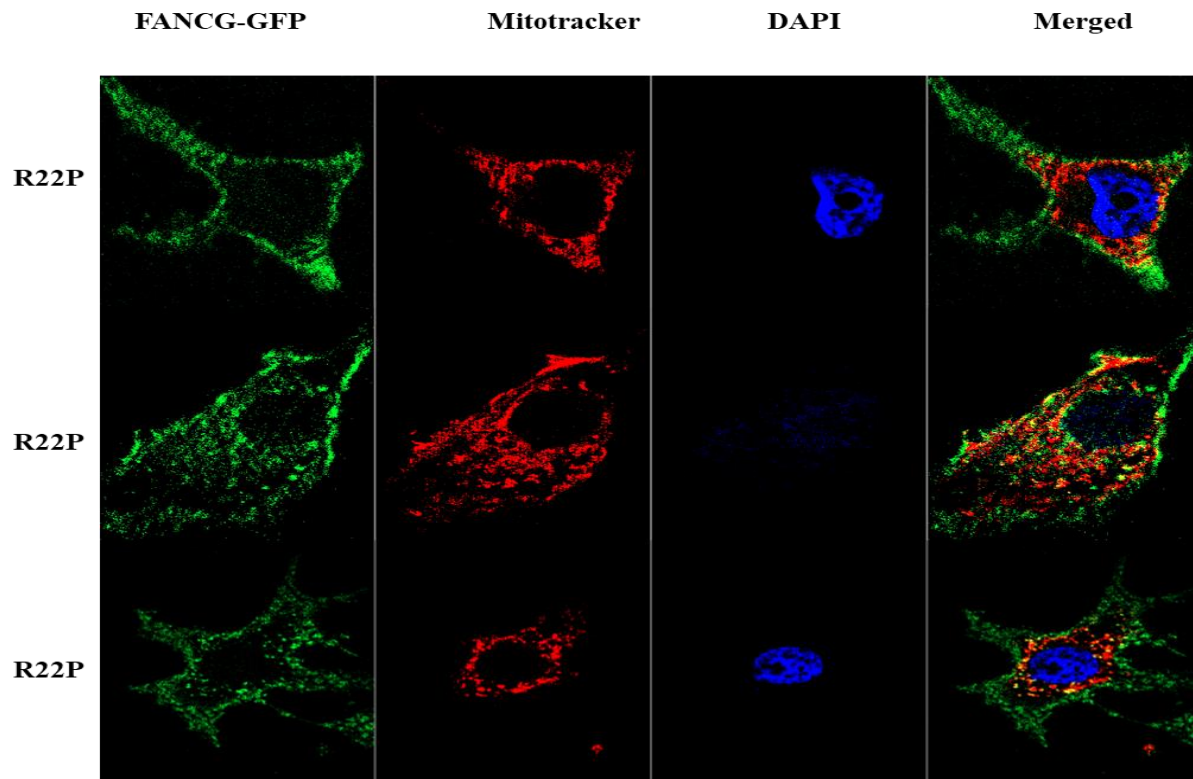

C

DAPI FANCG-GFP Mitotracker Merged

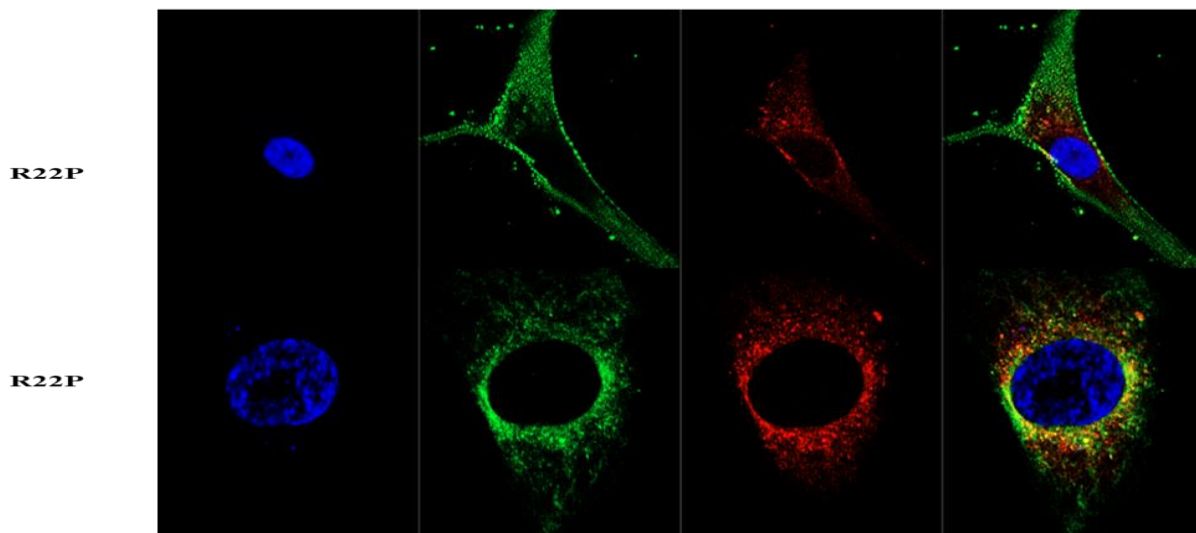

D

**Fig. S2. Mitochondrial localization of human FANCG-R22P mutant (FG-R22P) protein.** The insilico tools (A) TargetP1.1, MitoProtII-v1.101, iPSORT, Predotar, TppRED2.0, RSLpred, iLOC-Animal and MultiLoc have been used. mTP: mitochondrial targeting peptide; RC: Reliability class, SP: Signal peptide; MLS: Mitochondrial localization signal. (B) iPSORT analysis of FANCG (FG-WT) and FANCGR22P (FG-R22P) mutant protein for mitochondrial localization. (C) FG-R22P construct fused with GFP and Mitotracker have been transiently co-transfected into HeLa cells of different passages. and (D) FANCG parental cells. Co-localization of both GFP and Mitotracker has been observed (merged). Nucleus stained with DAPI.



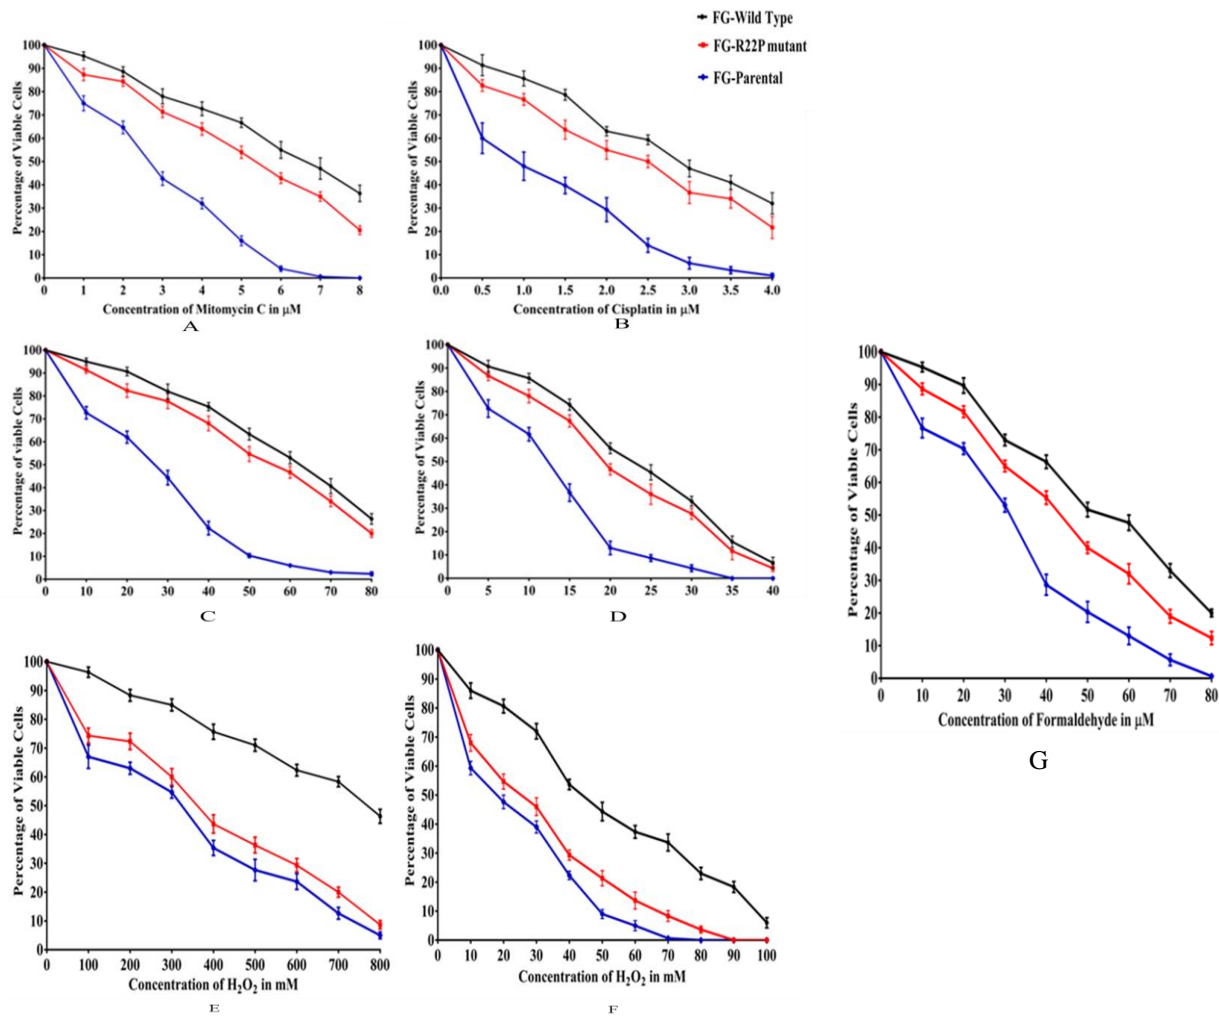

**Fig. S3. Drug sensitivity studies of FANCG corrected (black), FANCR22P (red) and FANCG parental cells (blue)** Cells were treated with increasing concentration of drug (MMC and cisplatin) (A & B) for two days and (C & D) Five days, hydrogen peroxide (H<sub>2</sub>O<sub>2</sub>) for (E) two hrs and (F) twenty four hrs. (G)Formaldehyde for two hrs. Cell survivals were determined by Trypan blue assay. Each value is the mean of repeated (three times) experiments.

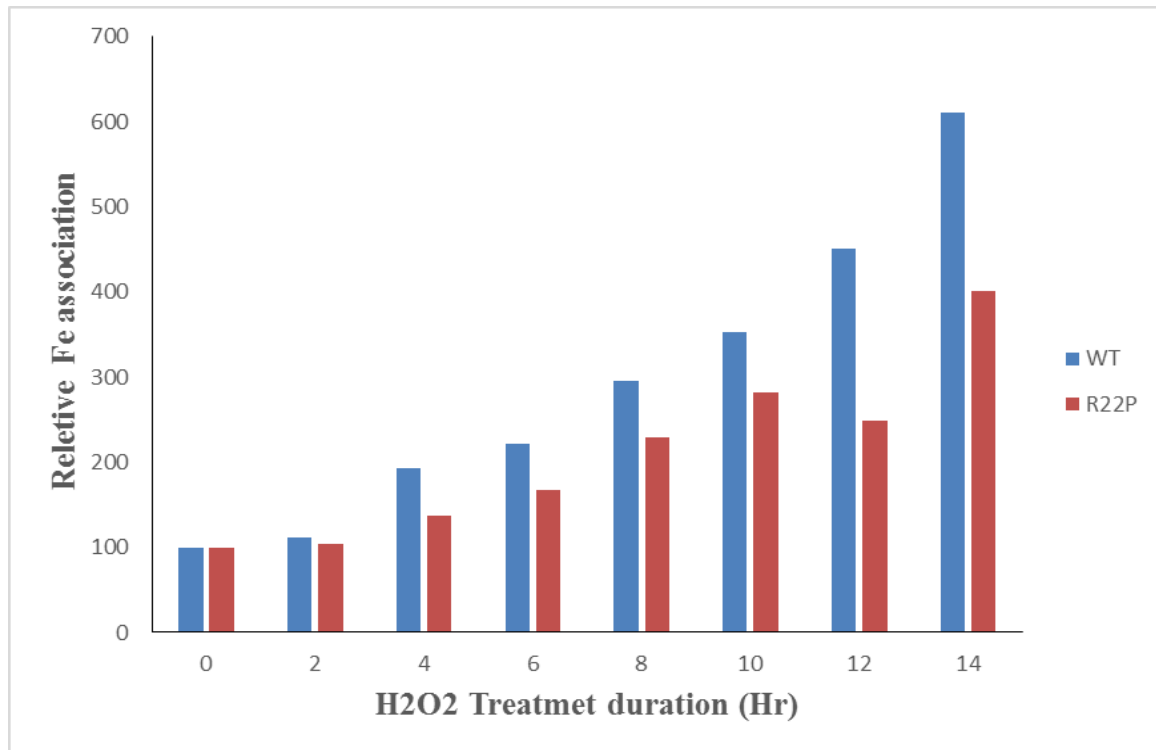

893

894

895

896

897

898

**Fig. S4. Fe association with Ferritin.** Cells were incubated in IMDM media, containing <sup>55</sup>Fe and treated with H<sub>2</sub>O<sub>2</sub> (10μM) for fourteen hrs followed by MMC (100nM) treatment for thirty minutes at two hr intervals. Ferritin was immuno-precipitated (IP) using ferritin antibody (Sigma) and the concentration of <sup>55</sup>Fe was determined. Concentration of <sup>55</sup>Fe at 0 hr was considered as hundred. Blue bar represents FancG wild type fibroblast cells, Red bar represents FancG mutant (R22P) fibroblast cells.

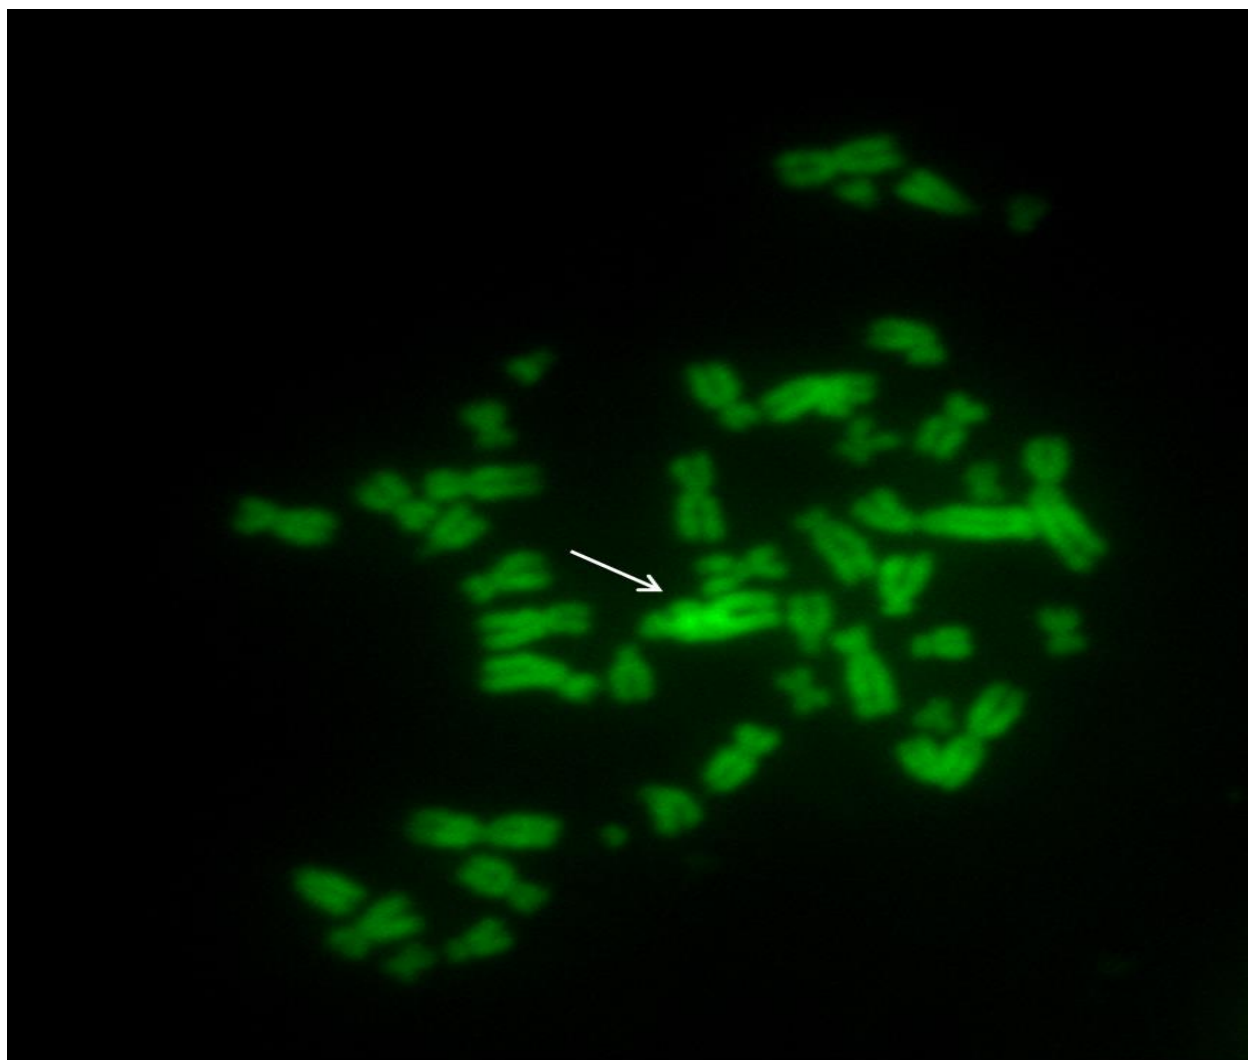

A

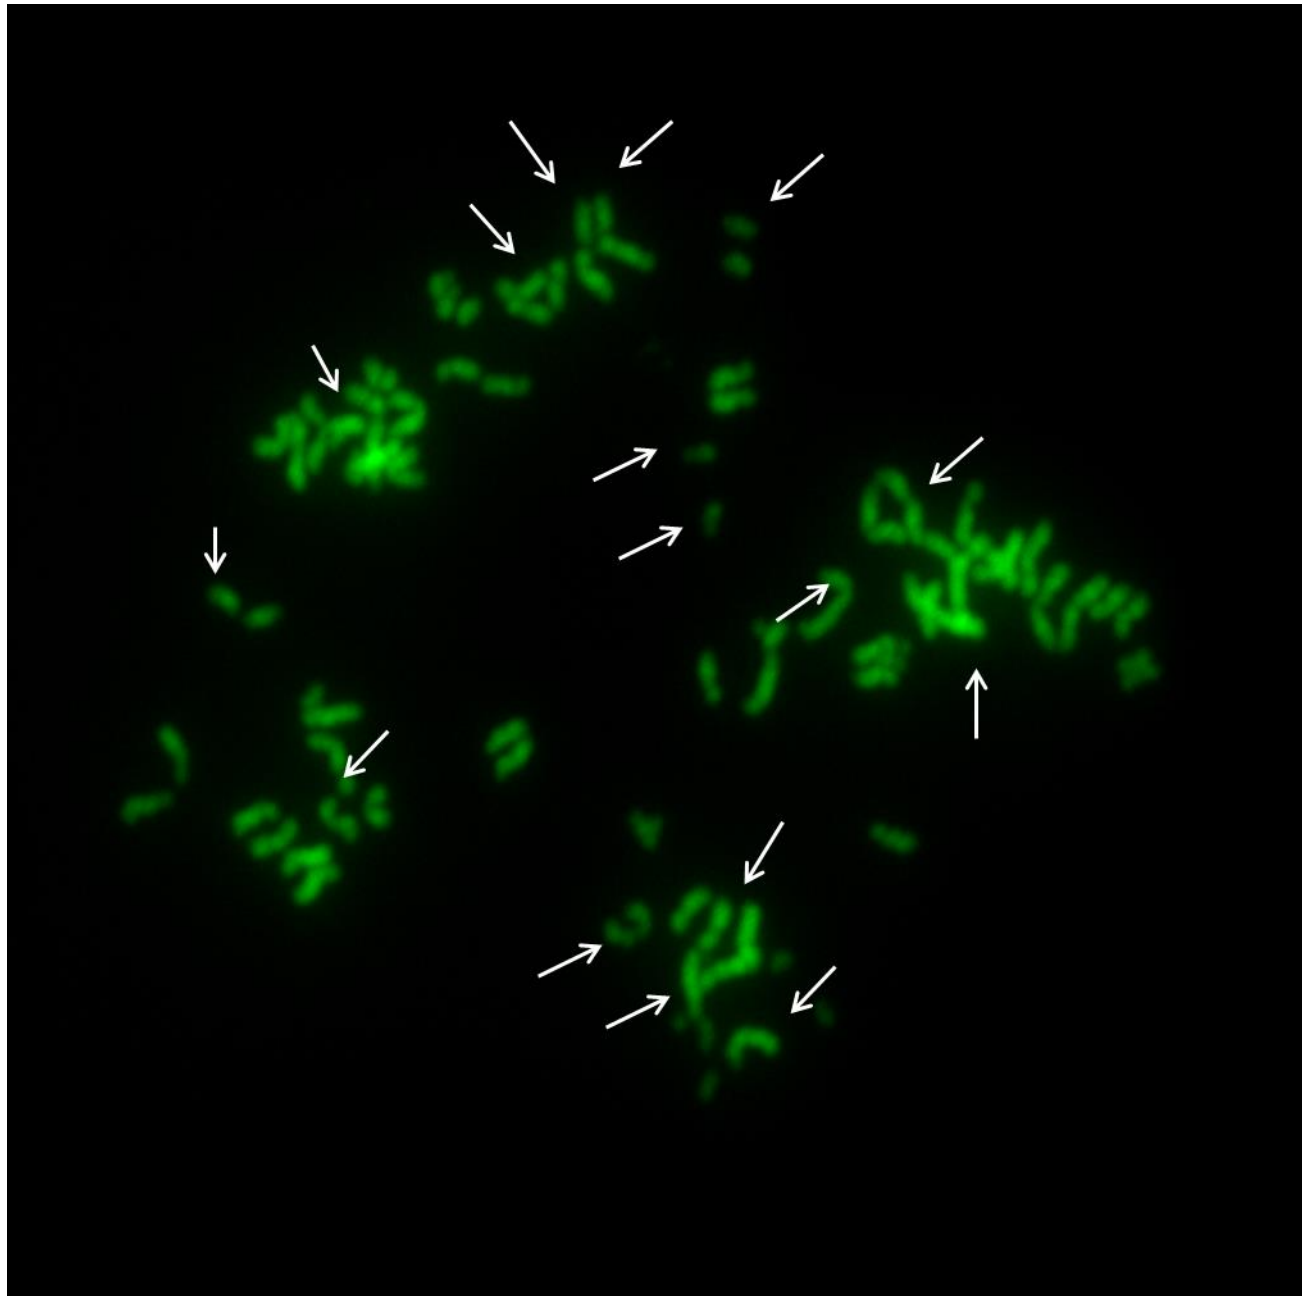

B

900 **Fig. S5 Chromosome preparation of R22P cells treated (A) with MMC and (B) with both**  
901 **MMC and H2O2. The arrows represent the deformed structure of the chromosome.**  
902

903  
904  
905  
906  
907  
908  
909  
910  
911  
912

| PROTEIN       | TargetP 1.1  |          | MitoProt II - v1.101 |            | iPSORT    |            | Predotar    | TPpRED2.0 |              |
|---------------|--------------|----------|----------------------|------------|-----------|------------|-------------|-----------|--------------|
|               | mTP          | RC       | probability          | Charge     | SP        | MLS        |             |           |              |
| FANCA         | 0.223        | 3        | 0.0897               | -15        | NO        | NO         | 0.00        | NO        | 0.985        |
| FANCB         | 0.061        | 1        | 0.0732               | -05        | NO        | NO         | 0.00        | NO        | 0.998        |
| FANCC         | 0.059        | 2        | 0.0590               | -15        | NO        | NO         | 0.00        | NO        | 0.995        |
| FANCD1        | 0.115        | 2        | 0.0169               | -30        | NO        | NO         | 0.01        | NO        | 0.994        |
| <b>FANCD2</b> | <b>0.182</b> | <b>2</b> | <b>0.2296</b>        | <b>-42</b> | <b>NO</b> | <b>YES</b> | <b>0.03</b> | <b>NO</b> | <b>0.999</b> |
| FANCE         | 0.090        | 1        | 0.0070               | -20        | NO        | NO         | 0.00        | NO        | 0.995        |
| FANCF         | 0.056        | 2        | 0.1802               | +06        | NO        | NO         | 0.00        | NO        | 0.725        |
| <b>FANCG</b>  | <b>0.212</b> | <b>3</b> | <b>0.4097</b>        | <b>-13</b> | <b>NO</b> | <b>YES</b> | <b>0.02</b> | <b>NO</b> | <b>0.922</b> |
| FANCI         | 0.054        | 1        | 0.1082               | -03        | NO        | NO         | 0.00        | NO        | 0.993        |
| FANCJ         | 0.093        | 2        | 0.0758               | -11        | NO        | NO         | 0.00        | NO        | 0.987        |
| FANCL         | 0.321        | 4        | 0.1797               | -05        | NO        | NO         | 0.02        | NO        | 0.857        |
| FANCM         | 0.875        | 2        | 0.5774               | -41        | NO        | NO         | 0.29        | YES       | 0.977        |
| FANCN         | 0.088        | 1        | 0.0090               | -01        | NO        | NO         | 0.00        | NO        | 1.000        |
| FANCO         | 0.577        | 4        | 0.3127               | -02        | NO        | NO         | 0.20        | NO        | 0.898        |
| FANCP         | 0.061        | 2        | 0.0081               | -27        | NO        | NO         | 0.00        | NO        | 0.930        |
| FANCQ         | 0.050        | 3        | 0.0699               | -07        | NO        | NO         | 0.00        | NO        | 0.999        |
| FANCR         | 0.059        | 1        | 0.0159               | -13        | NO        | NO         | 0.00        | NO        | 0.997        |
| FANCS         | 0.087        | 2        | 0.0248               | -86        | NO        | NO         | 0.00        | NO        | 0.986        |
| FANCT         | 0.346        | 4        | 0.2180               | 5          | NO        | NO         | 0.04        | NO        | 0.984        |

913  
914  
915

**Table.S1A**

| <i>FA Protein</i>    | <i>RSLpred</i>   |                   | <i>Iloc-Animal</i> |                | <i>MultiLoc</i>  |                 |
|----------------------|------------------|-------------------|--------------------|----------------|------------------|-----------------|
|                      | <i>In Mito.</i>  |                   | <i>Mito.</i>       | <i>Nucleus</i> | <i>SVMTarget</i> | <i>SVMaac</i>   |
| <i>FANCA</i>         | -0.362414        | <i>NO</i>         | <i>NO</i>          | <i>Yes</i>     | 0.0448445        | -0.96389        |
| <i>FANCB</i>         | 0.167961         | <i>Yes</i>        | <i>NO</i>          | <i>Yes</i>     | 0.0202808        | -0.95803        |
| <i>FANCC</i>         | -0.163899        | <i>Yes</i>        | <i>NO</i>          | <i>Yes</i>     | 0.0171726        | -0.88501        |
| <i>FANCD1</i>        | -0.081539        | <i>Yes</i>        | <i>NO</i>          | <i>Yes</i>     | 0.0201016        | -0.93240        |
| <b><i>FANCD2</i></b> | <b>-0.582377</b> | <i>No</i>         | <b><i>NO</i></b>   | <i>Yes</i>     | <b>0.0199836</b> | <b>-0.97083</b> |
| <i>FANCE</i>         | -0.107736        | <i>No</i>         | <i>NO</i>          | <i>Yes</i>     | 0.0387356        | -0.87646        |
| <i>FANCF</i>         | 0.2794675        | <i>Yes</i>        | <b><i>YES</i></b>  | <i>Yes</i>     | 0.392804         | -0.68467        |
| <b><i>FANCG</i></b>  | <b>-0.394209</b> | <b><i>Yes</i></b> | <b><i>YES</i></b>  | <i>Yes</i>     | <b>0.140140</b>  | <b>-0.93485</b> |
| <i>FANCI</i>         | 0.0149994        | <i>No</i>         | <i>NO</i>          | <i>Yes</i>     | 0.017365         | -0.93420        |
| <i>FANCI</i>         | -1.321411        | <i>No</i>         | <i>NO</i>          | <i>Yes</i>     | 0.081528         | -0.94827        |
| <i>FANCL</i>         | -0.859685        | <i>No</i>         | <i>NO</i>          | <i>Yes</i>     | 0.426852         | -0.89705        |
| <i>FANCM</i>         | -1.530589        | <i>No</i>         | <i>NO</i>          | <i>Yes</i>     | 0.954522         | -0.97890        |
| <i>FANCN</i>         | -0.866173        | <i>No</i>         | <i>NO</i>          | <i>Yes</i>     | 0.020205         | -0.90082        |
| <i>FANCO</i>         | 0.766075         | <b><i>YES</i></b> | <b><i>YES</i></b>  | <i>Yes</i>     | 0.640914         | -0.71261        |
| <i>FANCP</i>         | -1.845464        | <i>No</i>         | <i>NO</i>          | <i>Yes</i>     | 0.027835         | -0.87659        |
| <i>FANCQ</i>         | -0.140815        | <i>No</i>         | <i>NO</i>          | <i>Yes</i>     | 0.037467         | 0.661968        |
| <i>FANCR</i>         | 1.324080         | <i>Yes</i>        | <i>No</i>          | <i>Yes</i>     | 0.02329          | 0.637325        |
| <i>FANCS</i>         | -0.958446        | <i>No</i>         | <i>No</i>          | <i>Yes</i>     | 0.0135024        | -0.97070        |
| <i>FANCT</i>         | -0.912399        | <i>No</i>         | <i>No</i>          | <i>Yes</i>     | 0.079598         | 0.920697        |

916 **Table.S1. In silico analyses of Fanconi proteins for their cellular localization.** The tools (A)  
917 TargetP1.1, MitoProt II –v1.101, iPSORT, Predotar, TPrRED2.0 (B) RSLpred, Iloc-Animal and MultiLoc have been  
918 used. Maximum probability of mitochondrial localization of FA proteins is shown in bold. mTP: mitochondrial  
919 targeting peptide; RC: Reliability class, SP: Signal peptide; MLS: Mitochondrial localization signal.
